# 1 **From Genomics to Integrative Taxonomy? The Case Study of**

## 2 ***Pocillopora* Corals**

3

4 NICOLAS OURY<sup>1,2,\*</sup>, CYRIL NOËL<sup>3</sup>, STEFANO MONA<sup>4,5,6</sup>, DIDIER AURELLE<sup>4,7</sup>, AND HELENE  
5 MAGALON<sup>1,2,6</sup>

6

7 <sup>1</sup> *UMR ENTROPIE (UMR 9220 – Université de La Réunion, IRD, IFREMER, Université de*  
8 *Nouvelle-Calédonie, CNRS), Université de La Réunion, St Denis, La Réunion, France*

9 <sup>2</sup> *Laboratoire Cogitamus, Paris, France*

10 <sup>3</sup> *IFREMER – IRSI – Service de Bioinformatique (SeBiMER), Plouzané, France*

11 <sup>4</sup> *ISYEB – Institut de SYstématique, Évolution, Biodiversité (UMR 7205 – CNRS, MNHN, Sorbonne*  
12 *Université, EPHE, Université des Antilles), École Pratique des Hautes Études, Paris, France*

13 <sup>5</sup> *EPHE, PSL Research University, Paris, France*

14 <sup>6</sup> *Laboratoire d'Excellence CORAIL, Perpignan, France*

15 <sup>7</sup> *Aix Marseille Université, Université de Toulon, CNRS, IRD, MIO, Marseille, France*

16 \* *Correspondence to be sent to: Nicolas Oury, UMR ENTROPIE, Université de La Réunion,*  
17 *Faculté des Sciences et Technologies, 15 bd René Cassin, CS 92003, 97744 St Denis Cedex 09, La*  
18 *Réunion, France; E-mail: nicolasoury@hotmail.fr.*

19

## 20 **ORCID**

21 NO <https://orcid.org/0000-0002-5386-4633>

22 CN <https://orcid.org/0000-0002-7139-4073>

23 SM <https://orcid.org/0000-0001-9087-0656>

24 DA <https://orcid.org/0000-0002-3922-7291>

25 HM <https://orcid.org/0000-0002-7061-955X>

26 *Abstract.* — With the advent of genomics, sequencing thousands of loci from hundreds of  
27 individuals now appears feasible at reasonable costs, allowing complex phylogenies to be resolved.  
28 This is particularly relevant for cnidarians, for which insufficient data due to the small number of  
29 currently available markers, coupled with difficulties in inferring gene trees and morphological  
30 incongruences, encrypts species boundaries, thereby blurring the study and conservation of these  
31 organisms. Yet, can genomics alone be used to delimit species in an integrative taxonomic context?  
32 Here, focusing on the coral genus *Pocillopora*, which plays key roles in Indo-Pacific reef  
33 ecosystems but has challenged taxonomists for decades, we explored and discussed the usefulness  
34 of multiple criteria (genetics, morphology, biogeography and symbiosis ecology) to delimit species  
35 of this genus. Phylogenetic inferences, clustering approaches and species delimitation methods  
36 based on genome-wide single-nucleotide polymorphisms (SNPs) were first used to resolve  
37 *Pocillopora* phylogeny and propose genomic species hypotheses from 356 colonies sampled across  
38 the Indo-Pacific (western Indian Ocean, tropical southwestern Pacific and south-east Polynesia).  
39 These species hypotheses were then compared to previous genetic evidences, as well as to  
40 evidences based on morphology, biogeography and symbiosis. Genomics allowed to delimit 21  
41 species hypotheses where only seven are currently recognised based on current taxonomy.  
42 Moreover, 13 species were strongly supported by all approaches, either confirming their currently  
43 recognised species status, or supporting the presence of new species that need to be formally  
44 described. Some of the other genomic species hypotheses were supported by biogeographic or  
45 symbiosis evidences, but additional investigations are needed to state on their species status.  
46 Altogether, our results support (1) the obsolescence of macromorphology (i.e., overall colony and  
47 branches shape) but the relevance of micromorphology (i.e., corallite structures) to refine  
48 *Pocillopora* species limits, (2) the need to identify molecularly species prior to their study, as  
49 morphology can blur species identification on the field, (3) the relevance of the mtORF (coupled  
50 with other markers in some cases) as a diagnostic marker of most species, and (4) the need for a  
51 taxonomical revision in the *Pocillopora* genus. These results give new insights into the usefulness  
52 of multiple criteria for resolving *Pocillopora* species limits and will ultimately provide helpful  
53 insights for the conservation of the species from this scleractinian genus. [biogeography; cryptic  
54 species delimitation; Indo-Pacific; microsatellites; morphology; phylogenetics; single-nucleotide  
55 polymorphism (SNP); Symbiodiniaceae]

## SPECIES DELIMITATION IN *POCILLOPORA* CORALS

56 Efficiently protecting species implies knowing their life history traits and functioning. This requires  
57 accurately defining species limits, something that may sound trivial but has long been debated (e.g.,  
58 Mayden 1997; De Queiroz 2007). Indeed, several species concepts, based on more or less  
59 compatible criteria, have previously been proposed (reviewed in De Queiroz 2007). Each concept  
60 has its own advantages, but also its own approximations of the biological truth, so it now appears  
61 evident to integrate multiple criteria and go towards a unified species concept (De Queiroz 2005).  
62 However, it is not always obvious how these criteria should be combined, and some may be more  
63 informative than others or give contradictory insights, depending on organisms.

64         Accurately delimiting species is particularly essential for scleractinian corals, the cornerstone  
65 of coral reefs, which are experiencing critical decline worldwide (Hughes et al. 2017, 2018, 2019;  
66 Heron et al. 2018), attributable both to local (e.g., coastal development, over-fishing, pollution) and  
67 global (e.g., climate change) pressures. Coral taxonomy initially relied on skeleton morphological  
68 traits (i.e., *corallum* macromorphology and corallite microstructure; Vaughan and Wells 1943;  
69 Wells 1956; Chevalier 1971; Veron 2000), but phenotypic plasticity hampers reliable species  
70 delimitation on this basis (see Todd 2008). With the advent of genetics, molecular approaches have  
71 been used to explore species boundaries, revealing incongruences of conventional systematics  
72 within many scleractinian genera (e.g., Keshavmurthy et al. 2013; Schmidt-Roach et al. 2014; Gélín  
73 et al. 2017b; Cunha et al. 2019; Arrigoni et al. 2020). Nuclear internal transcribed spacers (ITS) and  
74 mitochondrial markers have been extensively used in phylogenetic inferences (e.g., Benzoni et al.  
75 2007; Gélín et al. 2017b; Nakajima et al. 2017). However, intra-individual and intra-specific  
76 variations for the formers (van Oppen et al. 2000; Chen et al. 2004; Vollmer and Palumbi 2004),  
77 and relatively slow evolutionary rates for the latter (van Oppen et al. 1999; Shearer et al. 2002;  
78 Hellberg 2006), make these markers usually not informative for species delimitation in most genera  
79 (e.g., Forsman et al. 2009; Terraneo et al. 2016). Additionally, the small number of currently  
80 available markers, coupled with hybridisation (Willis et al. 2006; Combosch et al. 2008; Richards et  
81 al. 2008), introgression (Combosch and Vollmer 2015; Hellberg et al. 2016) and incomplete lineage

OURY ET AL.

82 sorting in gene trees (van Oppen et al. 2001; Fukami et al. 2008) blur phylogenetic relationships  
83 between taxa.

84 The recent development of high-throughput sequencing technologies now enables the cost-  
85 effective target of large numbers of loci from hundreds of individuals from virtually any species  
86 (Metzker 2010). These methods appear particularly promising to resolve complex phylogenies such  
87 as those involving scleractinian corals (e.g., Forsman et al. 2017; Cunha et al. 2019; Arrigoni et al.  
88 2020). In particular, restriction-site associated DNA sequencing (RADseq; Baird et al. 2008) and  
89 sequence capture (also called target enrichment; Hodges et al. 2007; Gnirke et al. 2009) are  
90 increasingly used, from population genetics to phylogenetic studies (see Narum et al. 2013 for a  
91 review). While RADseq typically generates datasets of anonymous loci, sequence capture enables  
92 the deep sequencing of previously identified loci of interest, but needs existing genomic resources  
93 to design probes (Davey et al. 2011; Harvey et al. 2016). When such genomic resources are  
94 unavailable for the species of interest, probes from genomic regions that are conserved across  
95 divergent taxa [e.g., ultraconserved elements (UCEs); <https://www.ultraconserved.org/>] can be used  
96 (Faircloth et al. 2012, 2013; McCormack et al. 2012).

97 The coral genus *Pocillopora* Lamarck, 1816 (Scleractinia, Pocilloporidae) represents a key  
98 component of coral reef ecosystems from the Indo-Pacific and the Red Sea (Veron 2000), as its  
99 branching colonies are abundant and sometimes the main bio-constructors (e.g., Benzoni et al.  
100 2003). However, its taxonomy remains challenging, and the extraordinary range of morphological  
101 diversity among its colonies has led to the coining of more than 40 species names (Hoeksema and  
102 Cairns 2022). Defining morphospecies based on morphological characters (shape and organisation  
103 of branches and verrucae), Veron (2000) recognised only 17 of them. Recent genetic studies  
104 identified several cryptic species and lineages within those morphospecies (see Gélín et al. 2017b  
105 for a review). As an illustration, the so-called *P. damicornis* (Linnaeus, 1758) was disentangled in  
106 five genetic lineages: *P. damicornis* types  $\alpha$ ,  $\beta$ ,  $\delta$ ,  $\gamma$ , and  $\epsilon$  (Schmidt-Roach et al. 2012), *a posteriori*  
107 defined as five distinct species and named *P. damicornis* (Linnaeus, 1758), *P. acuta* Lamarck, 1816,

## SPECIES DELIMITATION IN *POCILLOPORA* CORALS

108 *P. aliciae* Schmidt-Roach, Miller & Andreakis 2013, *P. verrucosa* (Ellis & Solander, 1786), and  
109 *P. brevicornis* Lamarck, 1816, respectively (Schmidt-Roach et al. 2014). Following this  
110 taxonomical revision of the genus, 21 valid *Pocillopora* species are currently accepted (Hoeksema  
111 and Cairns 2022). Besides, using species delimitation methods based on sequence data from  
112 colonies sampled in three marine provinces (western Indian Ocean, tropical southwestern Pacific  
113 and south-east Polynesia), G  lin et al. (2017b) defined within the *Pocillopora* genus 16 primary  
114 species hypotheses (PSHs *sensu* Pante et al. 2015). Some of these PSHs correspond to currently  
115 accepted species, but others do not and would therefore represent undescribed species. Additionally,  
116 using microsatellites, some PSHs were partitioned into several secondary species hypotheses (SSHs  
117 *sensu* Pante et al. 2015), themselves partitioned into several divergent but sympatric genetic clusters  
118 (G  lin et al. 2017a, 2017b, 2018a, 2018b; Oury et al. 2020a, 2021, 2022). This genetic partitioning  
119 questions species limits and shelves taxonomic uncertainties for which traditional genetic markers  
120 appear not enough resolute. So far, only two studies (Johnston et al. 2017, 2022) have inferred  
121 phylogenetic relationships among species of the *Pocillopora* genus using high-throughput  
122 sequencing data (ezRAD; Toonen et al. 2013). In both cases, they resolved clear monophyletic  
123 groups that coincide with previously published mitochondrial clades based on the so-called open  
124 reading frame marker (mtORF; a putative protein-coding region of unknown function; Flot and  
125 Tillier 2007). However, their samplings were relatively concise (13 and 55 samples from seven  
126 morphospecies) and restricted to the Pacific, missing a huge part of the high diversity of this genus.

127 Here, considering a subset of 356 *Pocillopora* colonies from the same sampling set as in  
128 G  lin et al. (2017b), representing the totality of the PSHs, SSHs and clusters previously identified  
129 (see G  lin et al. 2017a, 2017b, 2018a, 2018b; Oury et al. 2020a, 2021, 2022), as well as all  
130 morphotypes sampled, we used sequence capture of UCEs and exon loci to collect single-nucleotide  
131 polymorphisms (SNPs). Maximum-likelihood and Bayesian phylogenetic inferences, clustering  
132 approaches and species delimitation methods based on SNP data were applied to resolve the  
133 *Pocillopora* phylogeny and define genomic species hypotheses, which were compared to previous

OURY ET AL.

134 genetic partitionings of the genus (i.e., the PSHs, SSHs and clusters previously defined based on the  
135 mtORF marker and microsatellites). Genetic evidences were then confronted to other criteria  
136 (macro- and micromorphology, biogeography and associated Symbiodiniaceae communities), to  
137 propose species delimitation of *Pocillopora* in an integrative taxonomic context. The usefulness of  
138 each criterion and its integration were then discussed.

139

140 **MATERIALS AND METHODS**

141 Detailed materials and methods, including sampling, sequencing and analytical methods, are  
142 available in Appendices 1-4.

143

144 ***Sampling***

145 The sampling was the same as in G elin et al. (2017b) and comprised ca. 9,000 *Pocillopora*  
146 colonies from various habitats and morphotypes, from three marine provinces: the western Indian  
147 Ocean (WIO), the tropical southwestern Pacific (TSP) and the south-east Polynesia (SEP). All  
148 colonies were previously genotyped with 13 microsatellites and for a subset, we also sequenced the  
149 mitochondrial ORF locus (mtORF; see G elin et al. 2017b for more details). Each colony was thus  
150 assigned beforehand a primary and a secondary species hypothesis (PSH and SSH, respectively;  
151 *sensu* G elin et al. 2017b), and a cluster when appropriate, based on these genetic data (see, for  
152 example, Oury et al. 2021). From now, to simplify the reading, PSHs that were not subdivided into  
153 several SSHs are designated SSHs, keeping their corresponding number (e.g., PSH01 switches to  
154 SSH01). These SSHs remain easily recognisable as no lowercase letter follows the number.

155 In this study, a subset of 356 *Pocillopora* colonies (Table S1 & Fig. S1 in Appendix 1),  
156 covering the totality of the localities and morphotypes sampled, as well as all SSHs and clusters,  
157 was considered to maximise the genetic diversity explored. Four *Seriatopora hystrix* and four  
158 *Stylophora pistillata* colonies were also included as outgroups.

159

## SPECIES DELIMITATION IN *POCILLOPORA* CORALS

### 160 ***Molecular Analyses***

161 *Sequencing and bioinformatics processing.* — All 364 colonies, plus eight sequencing  
162 replicates, were sequenced following a target enrichment protocol of 1,248 ultraconserved elements  
163 (UCEs) and 1,385 exon loci (Quattrini et al. 2018; see Appendix 2 for more details). The  
164 bioinformatics pipeline, from demultiplexed reads to final SNP datasets, is detailed in Appendix 2.  
165 Three individuals were discarded due to too many missing data (> 60%).

166

167 *Phylogenomic analyses.* — All following analyses (detailed in Appendix 2) were performed  
168 on two datasets, one keeping all filtered SNPs and the other keeping one randomly chosen SNP per  
169 locus to reduce the effect of linkage disequilibrium. Available *Pocillopora* genomes [i.e., *P. acuta*  
170 (Vidal-Dupiol et al. 2019), *P. damicornis* (Cunning et al. 2018) and *P. verrucosa* (Buitrago-López  
171 et al. 2020)] were also included by retrieving the genotypes of the SNPs corresponding to each  
172 dataset. Phylogenetic relationships were investigated using maximum likelihood (ML) and  
173 Bayesian inferences with RAxML-NG v0.9.0 (Kozlov et al. 2019) and BEAST v2.6.3 (Bouckaert et  
174 al. 2019), respectively, both using the GTR+G model. To support the phylogenomic analyses and  
175 further explore the genetic partitioning of the datasets, several clustering approaches were used.  
176 First, assignment tests were performed with STRUCTURE v2.3.4 (Pritchard et al. 2000), sNMF  
177 (Frichot et al. 2014) and discriminant analyses of principal components (dAPC; Jombart et al.  
178 2010). Signals of admixture were further investigated with NEWHYBRIDS v1.1 (Anderson and  
179 Thompson 2002). Second, Nei (1972) individual genetic distances were computed with the R v4.0.4  
180 (R Core Team 2021) library ‘*StAMPP*’ (Pembleton et al. 2013), and then used to build a minimum  
181 spanning tree (MST) and an unrooted equal-angle split network using EDENetworks v2.18  
182 (Kivelä et al. 2015) and SplitsTree v4.15.1 (Huson and Bryant 2006), respectively. Finally, SSH  
183 and cluster assignments issued from microsatellite data (Gélin et al. 2017a, 2017b, 2018a, 2018b;  
184 Oury et al. 2020a, 2021, 2022) were compared to the groups identified with all above analyses,  
185 named hereafter genomic species hypotheses (GSHs).  $F_{ST}$  (Weir and Cockerham 1984) were

OURY ET AL.

186 computed with ‘*StAMPP*’ (Pembleton et al. 2013) for each pair of GSHs, and the resulting matrix  
187 was clustered using the *heatmap.2* function from the R library ‘*gplots*’ (Warnes et al. 2020).

188 As some GSHs did not include any individual whose mtORF had previously been sequenced,  
189 and in order to retrieve the correspondence with previous studies, we completed the set of mtORF-  
190 sequenced colonies following G elin et al. (2017b), and further sequenced a subset of colonies for  
191 the PocHistone, a recently discovered marker partly mapped to partial histone 3 genes from other  
192 cnidarians, and allowing to identify *P. grandis* (the senior synonym of *P. eydouxi*) colonies  
193 (Johnston et al. 2018). The same laboratory protocol and analyses as for the mtORF in G elin et al.  
194 (2017b) were used (Appendix 2).

195

196 *Species delimitation analyses and divergence time estimation.* — To confirm GSHs, Bayes  
197 factor delimitation with genomic data (BFD\*; Leach e et al. 2014) was used to test several possible  
198 species delimitation models, using the SNAPP package (Bryant et al. 2012) implemented in  
199 BEAST v2.6.3 (Bouckaert et al. 2019; details in Appendix 2). To deal with computationally  
200 intensive demands from SNAPP, we first tested a batch of species delimitation scenarios to confirm  
201 the four main clades from the phylogeny (arbitrarily defined as monophyletic groups of individuals  
202 separated by nucleotide substitution per site distances of at least 0.4 on the ML tree). Then, several  
203 possible species delimitation models were tested within each clade separately, from one single  
204 species to the number of GSHs found for each clade (Table S5 in Appendix 2). Models were  
205 compared and ranked using their marginal likelihood estimate (MLE) and by calculating the Bayes  
206 factor (BF; Kass and Raftery 1995).

207 For each of the best-supported model (except for Clade 1, constituted of a single GSH), a  
208 coalescent-based tree was calculated with SNAPP. DensiTree v2.2.7 (Bouckaert 2010) was used to  
209 visualise the posterior distribution of topologies as cladograms, hence allowing for a clear depiction  
210 of uncertainties in the topology. Finally, GSH divergence times were estimated with the BEAST



## SPECIES DELIMITATION IN *POCILLOPORA* CORALS

211 package SNAPPER v1.0.1 (Stoltz et al. 2021; Appendix 2). The divergence between *Pocillopora*  
212 and outgroups was constrained to the middle-end Paleogene (28.4-42.7 Ma; Simpson et al. 2011).  
213

### 214 ***Macro- and Micromorphological Analyses***

215 In order to compare previously described morphospecies with GSHs (defined above), each  
216 colony was attributed a morphotype (or several when morphology was unclear), determined only by  
217 its *corallum* macromorphology [branch shape and thickness, size and uniformity of verrucae, and  
218 overall growth form as described in Veron (2000) and Schmidt-Roach et al. (2014)].

219 A subset of 10 colonies per GSH were also randomly selected for micromorphological  
220 observations of the bleached skeletons (particularly of the corallite structures) using scanning  
221 electron microscopy (SEM). A collection of skeleton images was thus obtained for each specimen,  
222 and multiple measurements of seven quantitative variables (e.g., corallite and columella diameters;  
223 see Appendix 3 for details) were done with ImageJ2 (Rueden et al. 2017; <https://imagej.nih.gov/ij/>).  
224 A non-parametric permutational multivariate anova (PERMANOVA) was then performed using the  
225 R library '*RVAideMemoire*' (Hervé 2021) with the GSHs as factor. Each metric was analysed  
226 separately using a non-parametric permutational anova. Two additional categorical variables were  
227 also considered, and a factorial analysis of mixed data (FAMD) was performed for all nine variables  
228 using the R library '*FactoMineR*' (Lê et al. 2008). A reference specimen representative of each  
229 species enclosed in the latest *Pocillopora* taxonomic revision (Schmidt-Roach et al. 2014) was  
230 included by measuring the variables on the images incorporated.

231

### 232 ***Characterisation of Associated Symbiodiniaceae***

233 Symbiodiniaceae communities were characterised for a subset of colonies (ca. 15 per GSH,  
234 when available; including three replicates) by high-throughput sequencing the ribosomal RNA  
235 internal transcribed spacer 2 (ITS2; see Appendix 4 for details). Reads were processed with the  
236 SAMBA v3.0.1 workflow (<https://github.com/ifremer-bioinformatics/samba>). Resulting operational

OURY ET AL.

237 taxonomic units (OTUs) were taxonomically assigned by querying a custom reference database of  
238 Symbiodiniaceae ITS2 adapted from the one available in SymPortal (downloaded on 13/01/2022;  
239 Hume et al. 2019). Taxonomic affiliations of the OTUs were confirmed by reconstructing the  
240 phylogenetic relationships among them using MAFFT v7.713 (Katoh and Standley 2013) and  
241 FastTree v2.1.11 (GTR+CAT model; Price et al. 2009). OTUs and individuals with less than 10 and  
242 500 sequences, respectively, were then removed to reduce possible sequencing errors. Alpha  
243 diversity metrics (Chao1 and Shannon) were computed at the OTU level with the R library ‘*vegan*’  
244 (Oksanen et al. 2020) and compared using non-parametric permutational ANOVA performed with  
245 the R library ‘*RVAideMemoire*’ (Hervé 2021), with the GSHs or the localities as factor. Finally, a  
246 nonmetric multidimensional scaling (NMDS) using Bray and Curtis (1957) dissimilarity index was  
247 performed to assess community similarity.

248

249 Species hypotheses delimited with each criterion (genomics, genetics, macro- and  
250 micromorphology, and symbiosis ecology) were then compared in an integrative species  
251 delimitation context. Sampling sites were also integrated to identify sympatric or allopatric GSHs.  
252 We then discussed the usefulness of each criterion for the delimitation of *Pocillopora* species.

253

## 254 **RESULTS**

255

### 256 ***Molecular Analyses***

257 *Sequencing and bioinformatics processing.* — A total of  $1.6 \times 10^9$  reads ( $2.5 \times 10^{11}$  bp) were  
258 produced with a highly variable number of reads per individual [varying from  $9.1 \times 10^3$  to  $8.2 \times 10^6$   
259 reads; mean  $\pm$  s.e. =  $(4.4 \pm 0.1) \times 10^6$  reads], but only three individuals (*a posteriori* removed) had  
260 less than a million reads. Quality controls and adapter trims then led to the removal of 3.0% of the  
261 bases. From the resulting trimmed reads, between 41.0% and 86.2% reads per individual were  
262 successfully mapped on the reference sequences (mean  $\pm$  s.e. =  $78.3 \pm 0.4\%$ ), with a mean coverage

## SPECIES DELIMITATION IN *POCILLOPORA* CORALS

263 depth ( $\pm$  s.e.) of  $60.2 \times (\pm 0.1)$ . Finally, SNPs calling and filtering (Table S4 in Appendix 2) led to  
264 two datasets: one including all SNPs ( $361$  individuals  $\times$   $17,465$  SNPs;  $5.8\%$  missing data) and the  
265 other keeping randomly one SNP per locus ( $361$  individuals  $\times$   $1,559$  SNPs;  $6.0\%$  missing data),  
266 with mean SNP coverage depths ( $\pm$  s.e.) of  $85.8 \times (\pm 0.4)$  and  $76.1 \times (\pm 1.3)$ , respectively.

267

268 *Phylogenomic analyses.* — All results were very consistent between both datasets (i.e., with  
269 one or all SNPs per locus). Thus, only results with one SNP per locus are presented below, but  
270 results keeping all SNPs are provided in Appendix 2. The phylogenetic trees inferred both with  
271 RAxML and BEAST gave similar tree topologies and recovered four strongly supported clades  
272 (Clades 1-4; i.e., monophyletic groups of individuals chosen here as separated by at least  $0.4$   
273 nucleotide substitution per site on the ML tree; Fig. 1), themselves split (except Clade 1) into a total  
274 of  $21$  genomic species hypotheses (GSHs). Each GSH (except three) was restricted to a single  
275 marine province (Table 1 & Fig. 1) and several GSHs were thus sympatric ( $12$  in the WIO,  $11$  in the  
276 TSP and  $2$  in the SEP; Table S6 in Appendix 2), supporting evolutionary rather than geographic  
277 reproductive isolations. Moreover, most of the GSHs (see below for the exceptions) roughly  
278 corresponded to previously defined secondary species hypotheses on the basis of microsatellites  
279 (SSHs *sensu* G  lin et al. 2017b). Therefore, to avoid introducing a new nomenclature and to ease  
280 correspondence with earlier works, the GSHs were named according to the corresponding SSHs  
281 (e.g., the GSH corresponding to SSH01 was named GSH01; Table 1 & Fig. 1).

282 SSH06, SSH07, SSH08 and SSH16, previously defined from few individuals, were not  
283 retrieved here as the corresponding individuals were grouped with those from SSH09a, SSH09b-1  
284 or SSH13c. Similarly, SSH09b-2 was grouped with SSH10 and was far apart from the rest of  
285 SSH09 *sensu lato*, suggesting that individuals from SSH09b-2 correspond to GSH10 (as observed  
286 with the mtORF). GSH09b, therefore, corresponds to only SSH09b-1. SSH12 and SSH15,  
287 previously grouped with SSH13a and SSH13c, respectively, using microsatellites (G  lin et al.  
288 2017b), were retrieved, confirming the distinction between them. Conversely, the over-partitioning

OURY ET AL.

289 previously found with microsatellites inside SSH04a (Oury et al. 2020a), SSH05d (Clusters 1 and 4  
290 in G elin et al. 2018b), SSH09a, SSH09c (G elin et al. 2018a) and SSH13c (Oury et al. 2021) was not  
291 retrieved, while the one found into SSH05c (Clusters 2 and 3 in G elin et al. 2018b; *a posteriori*  
292 named SSH05c-1 and SSH05c-2 in Oury et al. 2020b) was. Finally, SSH05a was split into three  
293 new groups (GSH05a-1, GSH05a-2 and GSH05a-3), and SSH09c split into two new groups  
294 (GSH09<sub>CWIO</sub> and GSH09<sub>CTSP</sub>) restricted to the WIO or the TSP, respectively (Table 1 & Fig. 1).

295 The three assignment methods, although estimating different admixture rates and suggesting  
296 different optimal *K* according to their respective criterion, gave similar results, retrieving almost all  
297 21 GSHs (Fig. 1 & S3-S4 in Appendix 2). In particular, sNMF and STRUCTURE highlighted  
298 introgression signals among several GSHs, compatible with allopatrism, that were further  
299 investigated with NEWHYBRIDS. This was notably the case within GSH05 *sensu lato*, but also with  
300 GSH12 as hybrids between GSH13a and GSH13c, GSH15 between GSH13c and GSH14, or  
301 GSH09<sub>CWIO</sub> between GSH09a and GSH09<sub>CTSP</sub> (Fig. 1 & S3-S4). No individual was assigned to a  
302 hybrid class (i.e., F1, F2 or backcrosses), except the GSH09<sub>CWIO</sub> ones that were assigned as F2  
303 hybrids from GSH09a and GSH09<sub>CTSP</sub> (data not shown). The two networks clustering also retrieved  
304 the 21 GSHs (Fig. S5 in Appendix 2). Thus, published genomes were assigned to the same GSHs  
305 with all datasets and analyses (Fig. 1 & Appendix 2): two [*P. acuta* (Vidal-Dupiol et al. 2019) and  
306 *P. verrucosa* (Buitrago-L opez et al. 2020)] were assigned to GSH13a (currently considered as  
307 *P. verrucosa*) and the third [*P. damicornis* (Cunning et al. 2018)] to GSH09<sub>CTSP</sub> (*P. grandis*).

308 Finally, all pairwise  $F_{ST}$  were significantly positive ( $P < 0.001$  \*\*\*) and the dendrogram  
309 topology obtained from the clustering of  $F_{ST}$  values was comparable to phylogenies (Fig. S6 in  
310 Appendix 2). Intra-clade  $F_{ST}$  ranged from 0.092\*\*\* to 0.689\*\*\* [mean ( $\pm$  s.e.) = 0.332  $\pm$  0.011],  
311 while inter-clade ones ranged from 0.420\*\*\* to 0.795\*\*\* [mean ( $\pm$  s.e.) = 0.551  $\pm$  0.004; Table S7  
312 in Appendix 2].

313 For the mtORF, 59 additional colonies were sequenced, but no new haplotype was found.  
314 Each haplotype (except three) was restricted to a single GSH (Table 1 & Fig. 1), confirming

## SPECIES DELIMITATION IN *POCILLOPORA* CORALS

315 previous results from G elin et al. (2017b). In particular, ORF27 was found in GSH09 *sensu lato*,  
316 thus corresponding to *P. grandis* and/or *P. meandrina*. To distinguish both species, we sequenced  
317 10 colonies of each of the five GSHs from Clade 4 for the PocHistone. Among the 43 successfully  
318 sequenced colonies, no heterozygote was found and eight novel 588 bp-haplotypes were identified  
319 (Hist01-08; GenBank accession numbers ON155826-ON155833; Table S9 in Appendix 2), to  
320 which we added the two available in GenBank (MG587096 and MG587097, corresponding to  
321 *P. grandis* and *P. meandrina*, respectively; Johnston et al. 2018; Table S9). All, but one haplotype  
322 (Hist07), were restricted to a single GSH (Table 1 & Fig. 1). Hist07 and Hist08 had the *P. grandis*  
323 diagnostic SNP, suggesting that GSH09c corresponds to *P. grandis* (Table S9). The reconstructed  
324 PocHistone phylogeny consistently regrouped these two haplotypes with the *P. grandis* one from  
325 Johnston et al. (2018), but all other haplotypes were grouped inconsistently with the defined GSHs  
326 (Fig. S7 in Appendix 2).

327

328 **Fig. 1** *Pocillopora* phylogeny reconstructed with one SNP per locus (361 individuals  $\times$  1,559 SNPs).  
329 (a) maximum likelihood (ML) phylogenetic tree. Branches are coloured according to marine provinces  
330 [black: western Indian Ocean (WIO); light grey: tropical southwestern Pacific (TSP); dark grey: south-east  
331 Polynesia (SEP)], and branch support, based on ML bootstrap analyses (first number) and Bayesian posterior  
332 probabilities (second number), is indicated for branches supporting the genomic species hypotheses (GSHs;  
333 delimited by dashed lines; full lines delimit the clades indicated alongside). Published genomes are indicated  
334 by lowercase letters [a: *P. verrucosa* (Buitrago-L opez et al. 2020); b: *P. acuta* (Vidal-Dupiol et al. 2019); c:  
335 *P. damicornis* (Cunning et al. 2018)].  
336 (b) sNMF assignments at  $K = 15$ ,  $K = 21$  and  $K = 25$ , mitochondrial open reading frame (mtORF) and  
337 PocHistone haplotypes repartition [number of colonies in parentheses; haplotypes in bold are found in  
338 several GSHs; \*: ORF30 (3) & ORF31(4)], corresponding secondary species hypotheses (SSHs) and clusters  
339 (defined in G elin et al. 2017a, 2017b, 2018a, 2018b; Oury et al. 2020a, 2021, 2022), genomic species  
340 hypotheses (GSHs; number of colonies in parentheses), clades and colour code retained throughout this  
341 study.

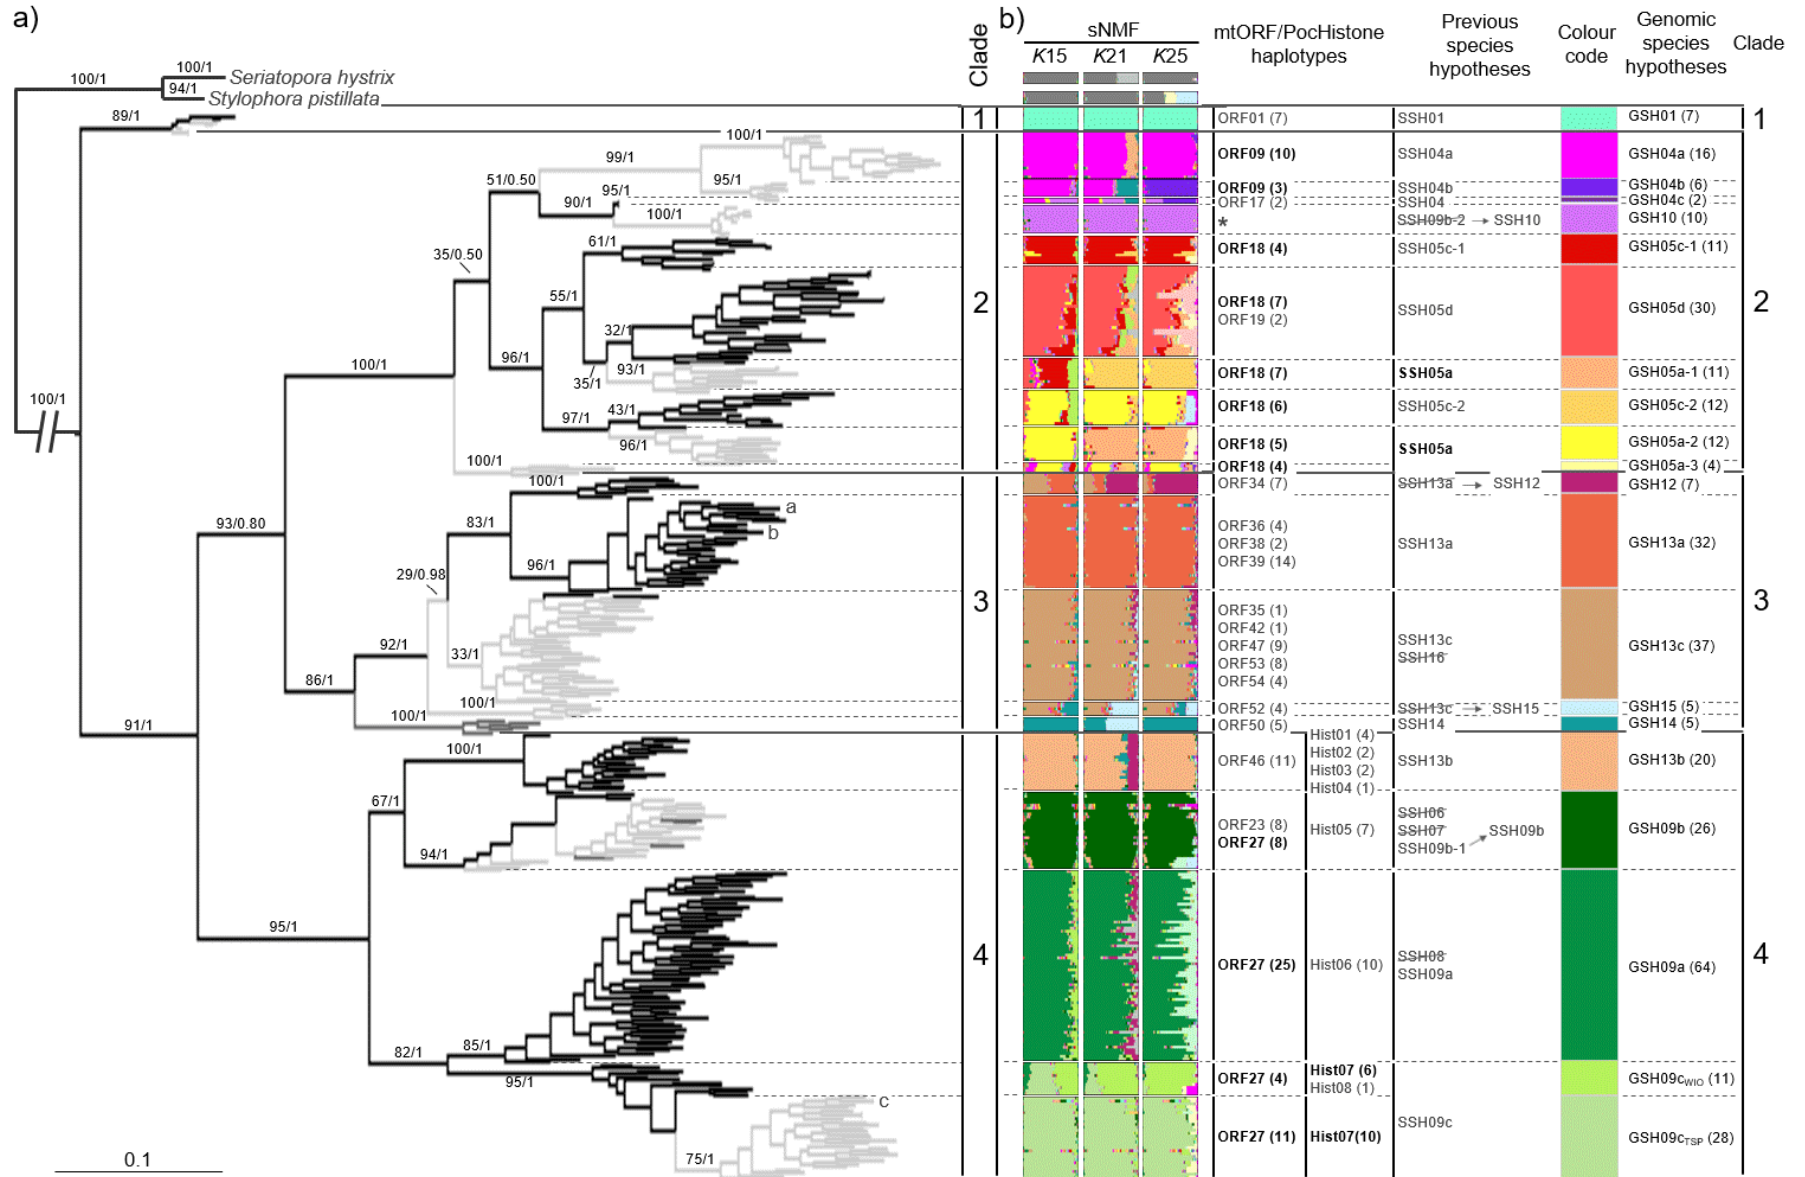

SPECIES DELIMITATION IN *POCILLOPORA* CORALS

343 **Table 1** Summary of the different approaches exploring *Pocillopora* species limits: genetics [genomic and corresponding corrected secondary species hypotheses  
 344 (GSHs and SSHs *sensu* Gélín et al. 2017b, respectively), mtORF (mitochondrial open reading frame) and PocHist. (PocHistone) haplotypes; values in bold are  
 345 retrieved in several GSHs], micro- and macromorphological, symbiosis (S.; each colour denotes distinct dominant Symbiodiniaceae; see Fig. S14 in Appendix 4)  
 346 and geographical (WIO: western Indian Ocean; TSP: tropical southwestern Pacific; SEP: south-east Polynesia; values in bold highlight sympatric GSHs within a  
 347 species complex) evidences. Corresponding lineages from previous studies are also indicated (arabic numerals correspond to types from Pinzón et al. 2013, roman  
 348 numerals to clades from Marti-Puig et al. 2014 and greek letters to types from Schmidt-Roach et al. 2014; lineages in parentheses were extrapolated from SSHs)\*:  
 349 *P. villosa nomen nudum* was proposed by Gélín et al. (2017b) but does not correspond to a currently valid species.

| Clade/GSH          | SSH                | mtORF      | Poc Hist.       | Micromorphology |                                                 | Macromorphology                                        | S.                                                                  | Biogeography                       | Current taxonomy                                           | Proposed taxonomy                     | Corresponding lineages |                                  |          |
|--------------------|--------------------|------------|-----------------|-----------------|-------------------------------------------------|--------------------------------------------------------|---------------------------------------------------------------------|------------------------------------|------------------------------------------------------------|---------------------------------------|------------------------|----------------------------------|----------|
|                    |                    |            |                 | Columella       | Septa                                           |                                                        |                                                                     |                                    |                                                            |                                       |                        |                                  |          |
| 1                  | 01                 | 01         | 01              |                 | Styliform                                       | Robust, with lobes                                     | Robust and encrusting                                               | WIO+TSP                            | <i>P. effusa</i>                                           | <i>P. effusa</i>                      | 2, IIIa                |                                  |          |
| 2                  | 04a                | 04a        | 09              |                 | Flat and spinulate                              | Absent to rudimentary, indicated by small septal teeth | Slender branches, round to flattened with more or less pointed ends | TSP                                | <i>P. damicornis</i>                                       | <i>P. damicornis</i> species complex? | 4a, Ib (4b, 4c, α)     |                                  |          |
|                    | 04b                | 04b        |                 |                 |                                                 |                                                        |                                                                     | TSP                                |                                                            |                                       |                        |                                  |          |
|                    | 04c                | n/a        |                 |                 |                                                 |                                                        |                                                                     | 17                                 |                                                            |                                       |                        | WIO                              | n/a      |
|                    | 10                 | 10         | 30,31           |                 |                                                 |                                                        |                                                                     |                                    | Short verrucose branches                                   | TSP                                   | <i>P. brevicornis</i>  | <i>P. brevicornis</i>            | (ε)      |
|                    | 05c-1              | 05c-1      | <b>18</b>       |                 |                                                 |                                                        |                                                                     |                                    | Slender and bushy branches, ramified towards terminal ends | WIO                                   | <i>P. acuta</i>        | <i>P. acuta</i> species complex? | 5, Ia, β |
|                    | 05d                | 05d        | <b>18,19</b>    |                 |                                                 |                                                        |                                                                     | WIO                                |                                                            |                                       |                        |                                  |          |
|                    | 05a-1              | <b>05a</b> | <b>18</b>       |                 |                                                 |                                                        |                                                                     | TSP                                |                                                            |                                       |                        |                                  |          |
|                    | 05c-2              | 05c-2      |                 |                 |                                                 |                                                        |                                                                     | WIO                                |                                                            |                                       |                        |                                  |          |
|                    | 05a-2              | <b>05a</b> |                 |                 |                                                 |                                                        |                                                                     | TSP                                |                                                            |                                       |                        |                                  |          |
| 05a-3              |                    |            |                 | TSP             |                                                 |                                                        |                                                                     |                                    |                                                            |                                       |                        |                                  |          |
| 3                  | 12                 | 12         | 34              |                 | Weakly developed to flat, covered with spinulae | Developped (+ long teeth)                              | Robust, short and verrucose branches, with a cauliflower aspect     | WIO                                | <i>P. verrucosa</i>                                        | <b>12</b>                             | 7                      |                                  |          |
|                    | 13a                | 13a        | 36,38,39        |                 | Often developed, with small (≈ 50 μm) teeth     | WIO                                                    |                                                                     | <b>13a</b>                         |                                                            | 3c, 3e (3g, 3j)                       |                        |                                  |          |
|                    | 13c                | 13c        | 35,42,47, 53,54 |                 | Well developed, with long (≈ 130 μm) teeth      | WIO+TSP                                                |                                                                     | <b>13c</b><br><i>P. verrucosa?</i> |                                                            | 3b, 3d, 3f, 3h, IIa, γ (3i, χ)        |                        |                                  |          |
|                    | 15                 | 15         | 52              |                 | Oval-convex                                     | Long and thin teeth                                    |                                                                     | TSP                                |                                                            | <b>15</b>                             | n/a                    |                                  |          |
|                    | 14                 | 14         | 50              |                 | Variable                                        | Thin teeth (80-120 μm)                                 |                                                                     | SEP                                |                                                            | <b>14</b>                             | n/a                    |                                  |          |
| 4                  | 13b                | 13b        | 46              | 01-04           | Flat and spinulate                              | Variable                                               | Robust branches, with a velvety aspect                              | WIO                                | <i>P. villosa*</i>                                         | <i>P. villosa*</i>                    | 3a, γ                  |                                  |          |
|                    | 09b                | 09b        | <b>23,27</b>    | 05              | Oval-convex, spinulate                          | Long (80-100 μm) and thin septal teeth                 | Robust long branches, often meandering                              | TSP+SEP                            | <i>P. meandrina</i>                                        | <b>09b</b><br><i>P. meandrina?</i>    | 1a, 8a, IIb, e/m (Ib)  |                                  |          |
|                    | 09a                | 09a        | <b>27</b>       | 06              |                                                 |                                                        |                                                                     | WIO                                |                                                            | <b>09a</b>                            |                        |                                  |          |
|                    | 09c <sub>WIO</sub> | 09c        |                 | <b>07-08</b>    | Styliform, with 1-3 stylae                      | Long (80-100 μm) and thin teeth, two cycles            | Robust, long and cylindrical branches                               | WIO                                | <i>P. grandis</i>                                          | <i>P. grandis</i> species complex?    |                        |                                  |          |
| 09c <sub>TSP</sub> | <b>07</b>          |            | TSP             |                 |                                                 |                                                        |                                                                     |                                    |                                                            |                                       |                        |                                  |          |

350

OURY ET AL.

351 *Species delimitation analyses.* — Among the scenarios tested to delimit the four main clades  
352 (Clades 1-4; Table S5 in Appendix 2), the best-supported model was the one separating those four  
353 clades (model 4: MLE = -11,868.07, BF = -). The three other models were ranked with a decreasing  
354 number of clades (i.e., from three clades to a single one;  $1,294.87 < \text{BF} < 4,706.03$ ; Table S5).  
355 Within each clade, the model with the lowest MLE was the one separating colonies according to the  
356 different GSHs previously identified based on phylogenomic and clustering analyses. The best-  
357 supported model for Clade 1 was therefore the 1-species model (GSH01; model 1.1: MLE =  
358 -1,112.45, BF = -), followed by the 1-species-per-ocean model (model 1.2: MLE = -1,381.70, BF =  
359 538.49). For Clade 2, analyses supported the 10-species model (model 2.17: MLE = -20,955.08,  
360 BF = -), followed by the models lumping GSH05a-1 and GSH05d (model 2.16: MLE = -21098.78,  
361 BF = 287.39) or GSH05a-2 and GSH05c-2 (model 2.14: MLE = -21,408.68, BF = 907.18). Finally,  
362 for Clades 3 and 4, the best supported models were the 5-species ones (model 3.8: MLE = -  
363 10,529.96, BF = -; model 4.11: MLE = -12,717.20, BF = -). However, Clade 4 5-species model  
364 was closely followed by the model lumping GSH09<sub>CWIO</sub> and GSH09<sub>CTSP</sub> (model 4.10: MLE =  
365 -12,763.15, BF = 91.89; Table S5). In summary, BFD\* supported the 21 GSHs identified with the  
366 phylogenomic analyses.

367 A total of four species trees were estimated (i.e., one for the best-supported model in the  
368 initial batch of scenarios, and then one for each best-supported model for scenarios within Clades 2-  
369 4 separately; Fig. 2a). For the initial batch of scenarios, three (out of three) consensus tree  
370 topologies were identified in the 95% HPD set, and all grouped Clades 1 and 4 together, whereas  
371 Clade 1 was the most distant group according to all previous analyses. The three topologies differed  
372 in whether Clades 2 or 3 shared a direct common ancestor with Clades 1 and 4 (59.1% and 22.0%  
373 of the trees, respectively), or together (18.9%; Fig. S8 in Appendix 2). For Clade 2, two (out of  
374 nine) consensus tree topologies were identified in the 95% HPD set. Both topologies were very  
375 similar and consistent with previous analyses, except that GSH05a-3 was alternatively grouped with  
376 or without GSH05a-2 and GSH05c-2 (52.1% and 44.3% of the trees, respectively; Fig. 2 & S8).



## SPECIES DELIMITATION IN *POCILLOPORA* CORALS

377 Only one (out of four) consensus tree topology was identified in the 95% HPD set for Clade 3  
378 (representing 98.4% of the trees). This topology was consistent with previous analyses, i.e.  
379 grouping GSH12 and GSH13a on one side, GSH13c and GSH15 on the other side, and GSH14  
380 being the most distant species (Fig. 2). Finally, for Clade 4, a total of 15 consensus tree topologies  
381 were found, of which five were in the 95% HPD set. All topologies identified GSH09<sub>C<sub>WIO</sub></sub> and  
382 GSH09<sub>C<sub>TSP</sub></sub> as sister species, but then differed in whether GSH09a shared a direct common ancestor  
383 with them (83.9% of the trees) and whether GSH09b and GSH13b were sister species (17.8%) or  
384 progressive outgroups (65.4%; Fig. 2 & S8).

385 The time-calibrated phylogeny indicated a first divergence within the *Pocillopora* genus  
386 20.4 Ma, separating on one side Clades 1 and 4, and on the other side Clades 2 and 3. Clade pairs  
387 then diverged 17.4 Ma and 16.0 Ma, respectively (Fig. 3). Each clade then went through a first  
388 diversification period in the late Miocene (6.5-7.5 Ma), followed by a second period in the Pliocene  
389 and the Quaternary (i.e., from 4.5 Ma). Thus, almost all *Pocillopora* GSHs appeared relatively  
390 recently (Fig. 3).

391

392 **Fig. 2** Species tree estimation for the 21 delimited *Pocillopora* genomic species hypotheses (GSHs). (a)  
393 complete set of consensus trees visualised with DensiTree for each best-supported model (i.e., for the initial  
394 batch of scenarios, and then for scenarios within Clades 2-4 separately). Higher density areas indicate greater  
395 topology agreement and different colours represent different topologies (trees with the highest clade  
396 credibility in blue). Node supports (Bayesian posterior probabilities) > 50% are indicated. (b) micro-  
397 (scale ≈ 500 μm) and macromorphological (scale ≈ 10 cm) overview of the GSHs (characteristic features  
398 only; see Appendix 5 for more illustrations). Bar colours symbolise separate micromorphological groups on  
399 the factorial analysis of mixed data (FAMD; see also Fig. S10 in Appendix 3) and morphotypes encountered  
400 in this study (sorted by occurrence) are indicated alongside photographs (ac: acuta, br: brevicornis, da:  
401 damicornis, ef: effusa, fu: fungiformis, gr: grandis, ke: kelleheli, li: ligulata, me: meandrina and ve:  
402 verrucosa). (c) geographical distribution of each GSH. Filled circles represent data from this study while  
403 hashed ones were taken from the literature [based on mtORF identifications; colours refer to the GSH and  
404 black denotes multiple sympatric GSHs (indicated alongside) or ambiguous identifications (no GSH  
405 indicated)].

a) Genomic species hypotheses tree

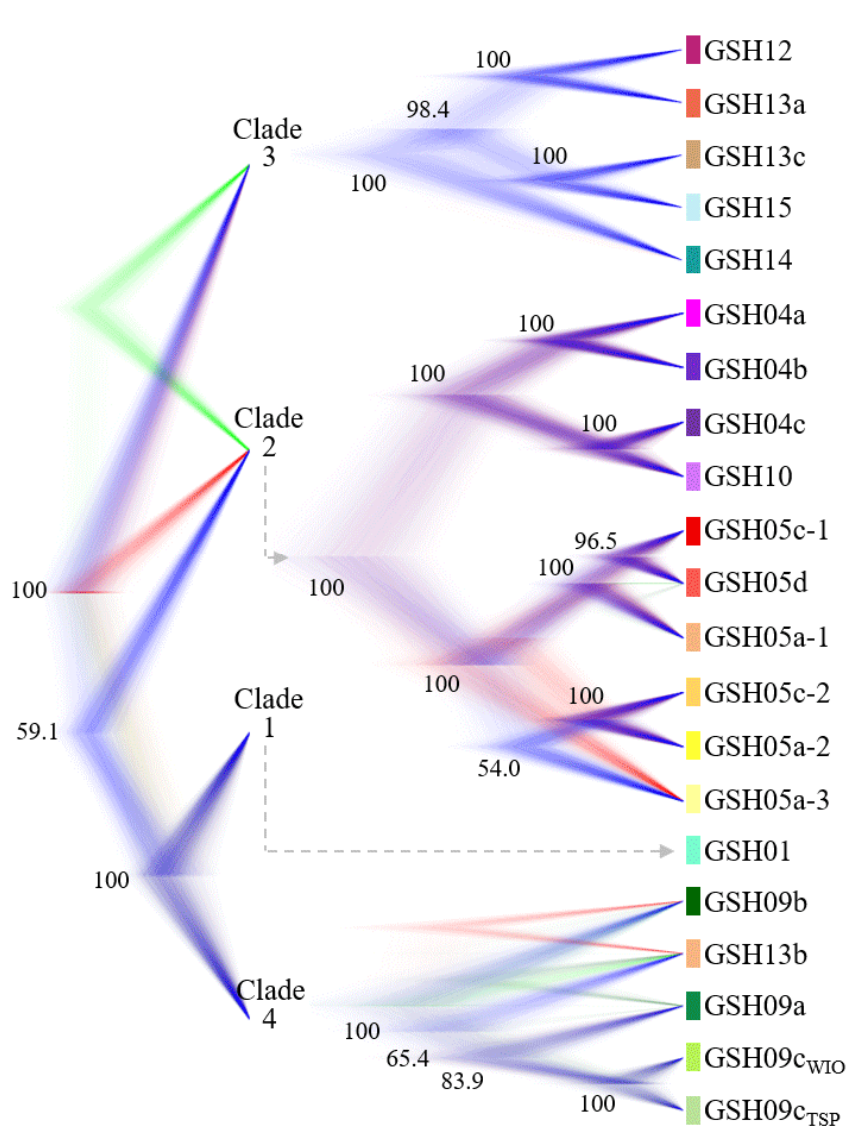

b) Morphology

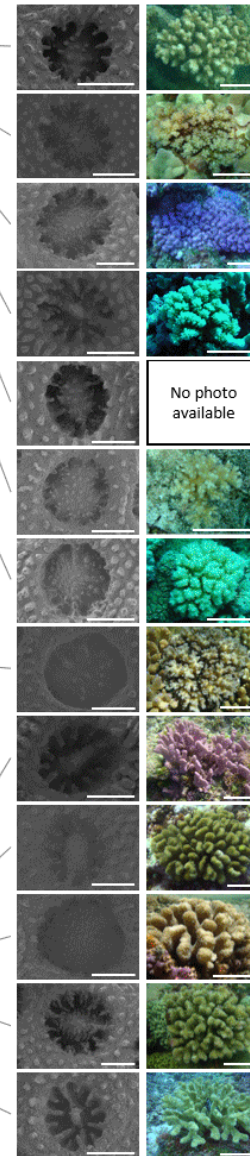

c) Geographical distribution

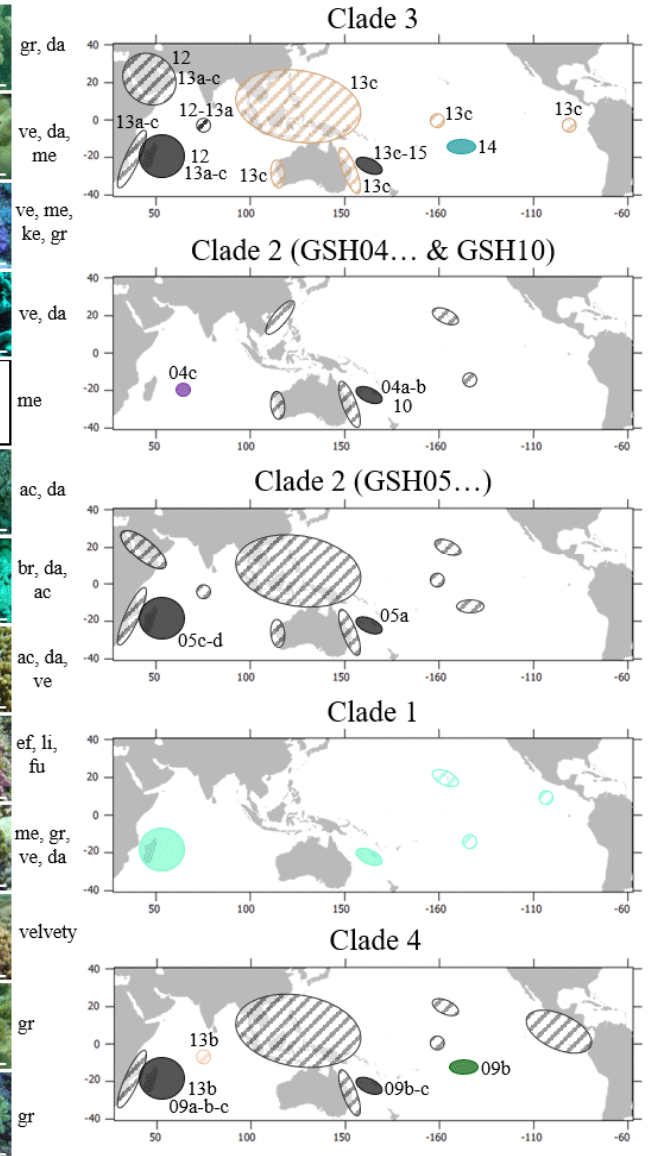

## SPECIES DELIMITATION IN *POCILLOPORA* CORALS

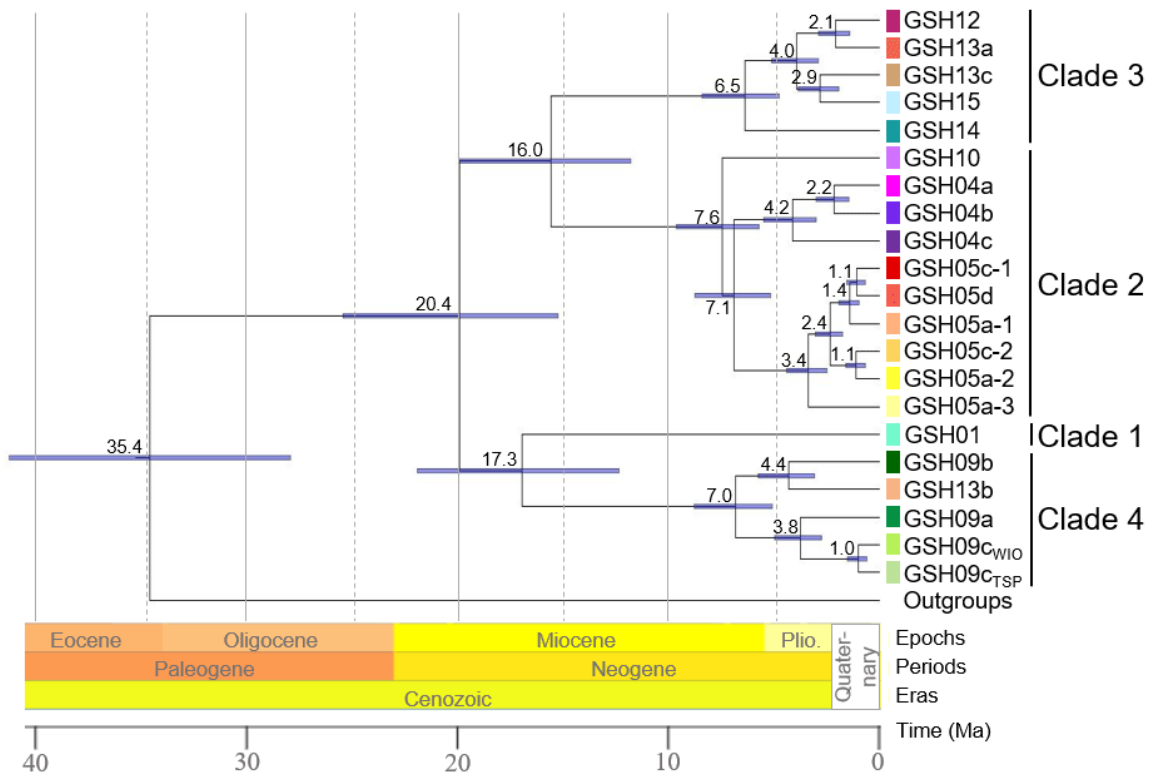

407 **Fig. 3** Time-calibrated phylogeny of *Pocillopora* genomic species hypotheses (GSHs). Values above nodes  
 408 indicate median node ages and blue bars represent the 95% highest posterior density (HPD) interval. Plio.:  
 409 Pliocene.  
 410

### 411 **Macro- and Micromorphological Analyses**

412 Morphotypes based on macromorphology were not exclusive of a single GSH. Indeed, each  
 413 GSH usually grouped colonies with a dominant morphotype, but also included several other  
 414 morphotypes (e.g., GSH09b mostly grouped *P. meandrina*-like colonies, but also *P. damicornis*-  
 415 like, *P. grandis*-like or *P. verrucosa*-like). Reciprocally, colonies from different GSHs can share the  
 416 same morphotype (e.g., *P. damicornis*-like colonies were found in 14 GSHs; Fig. 2). Clades 1 and 4  
 417 were mostly characterised by robust morphs with large branches, while Clades 2 and 3 grouped  
 418 more stunted colonies (Fig. 2 & Appendix 5).

419 Concerning micromorphology, intraspecific variations were smaller (Fig. 2 & S9 in  
 420 Appendix 3). In particular, all species from Clades 1 and 4 (except GSH13b) and GSH15 were  
 421 characterised by a styliform (GSH01, GSH09<sub>WIO</sub> and GSH09<sub>TSP</sub>) or oval-convex (GSH09a,  
 422 GSH09b and GSH15) columella, while all other species had a flat, more or less spinulate columella.

OURY ET AL.

423 Accordingly, significant differences among GSHs were found for the columella diameter variables  
424 (v6 and v7; non-parametric permutational anovas; v6:  $F_{(5,46)} = 92.95$ ,  $P < 10^{-3***}$ ; v7:  
425  $F_{(5,46)} = 98.20$ ,  $P < 10^{-3***}$ ), distinguishing three groups: GSH01 + GSH15, GSH09a + GSH09b  
426 and GSH09c<sub>WIO</sub> + GSH09c<sub>TSP</sub> (pairwise permutational t tests;  $P < 0.05^*$ ; Fig. S9). Significant  
427 differences among GSHs were also found for all other five numeric morphological variables (v1-v5;  
428 non-parametric permutational anovas;  $4.53 \leq F_{(19,150)} \leq 18.96$ ;  $P < 10^{-3***}$ ), but no particular pattern  
429 was identified, except that GSHs from Clade 2, GSH13a and GSH13b had poorly developed septa  
430 (Fig. 2 & S9). The PERMANOVA and FAMD (Fig. S9 & S10 in Appendix 3) also highlighted  
431 these differences. Five micromorphological groups were thus distinguished on the first three  
432 principal components of the FAMD (explaining 68.4% of the variability): GSH01, Clade 2 +  
433 GSH13a + GSH13b, GSH12 + GSH13c + GSH14, GSH09a + GSH09b + GSH15 and GSH09c<sub>WIO</sub>  
434 + GSH09c<sub>TSP</sub> (Fig. 2 & S10). Detailed macromorphological and micromorphological illustrations of  
435 the GSHs are provided in Appendix 5.

436

437 ***Characterisation of Associated Symbiodiniaceae***

438 ITS2 amplicon sequencing yielded a total of  $1.6 \times 10^7$  reads ( $4.0 \times 10^9$  bp) with between  
439  $1.7 \times 10^4$  to  $1.2 \times 10^5$  reads per individual [mean  $\pm$  s.e. =  $(6.1 \pm 0.1) \times 10^4$  reads]. After merging  
440 paired reads and removing chimeras,  $9.0 \times 10^6$  sequences were retained [with between 0 and  
441  $7.2 \times 10^4$  sequences per individual; mean  $\pm$  s.e. =  $(3.5 \pm 0.0) \times 10^4$  sequences], corresponding to  
442 1,014 amplicon sequence variants that were clustered in 590 operational taxonomic units (OTUs;  
443 represented by 1 to  $6.1 \times 10^5$  sequences). Finally, 534 OTUs (90.5%) were taxonomically assigned,  
444 with a majority (511 OTUs, representing 97.6% of the sequences) belonging to *Cladocopium*  
445 (formerly *Symbiodinium* clade C), and mostly to clades C1 (173 OTUs and 35.6% of the  
446 sequences), C40 (267 OTUs; 56.6% of the sequences) and C42 (45 OTUs; 3.6% of the sequences).  
447 The other OTUs were assigned to *Symbiodinium* (clade A1; 6 OTUs; 0.2% of the sequences),  
448 *Durisdinium* (clade D1; 2 OTUs; < 0.1% of the sequences), *Gerakladium* (clade G3; 12 OTUs;

## SPECIES DELIMITATION IN *POCILLOPORA* CORALS

449 0.1% of the sequences) and Symbiodiniaceae clade I (clades I1 and I3; 3 OTUs; < 0.1% of the  
450 sequences). The reconstructed phylogeny based on these OTUs retrieved the five genera, with  
451 largely unresolved polytomies within *Cladocopium*, as previously observed (LaJeunesse 2005;  
452 Brener-Raffalli et al. 2018; Fig. S11 in Appendix 4). Nevertheless, such polytomies should not  
453 affect subsequent analyses, as performed at the OTU level.

454 From the remaining 252 individuals and 552 OTUs that passed the filtration steps, OTU  
455 richness within colonies varied from 0.14 to 2.67 for Shannon diversity index, and from 2 to 39 for  
456 Chao1 index. Both indexes were significantly different among GSHs (non-parametric permutational  
457 anova; Shannon:  $F_{(20,231)} = 3.89$ ,  $P < 10^{-3***}$ ; Chao1:  $F_{(20,231)} = 2.96$ ,  $P < 10^{-3***}$ ; Fig. S12 in  
458 Appendix 4), but no significant difference was found in Chao1 post-hoc tests (pairwise  
459 permutational t tests;  $P > 0.05^{NS}$ ), and no obvious pattern was found for Shannon (Fig. S12).  
460 Differences were clearer when looking at the proportion of each taxon within samples (Fig. S13 in  
461 Appendix 4). For example, individuals from GSH04c, GSH09a and GSH13a displayed mainly  
462 C1ky [ $38.8 \pm 2.4\%$  on average ( $\pm$  s.e.)], while it was almost absent in other GSHs. Similarly,  
463 GSH05c-2, GSH13c and GSH15 contained mainly C1ag ( $56.5 \pm 4.6\%$ ) and GSH05c-1, GSH05d,  
464 GSH12 and GSH14 mainly C1d ( $50.0 \pm 4.4\%$ ). Except few individuals, other GSHs contained  
465 almost exclusively C40c (Fig. S13). Accordingly, the NMDS based on Bray and Curtis (1957)  
466 dissimilarity index followed this partitioning with three groups on the first two principal  
467 components (explaining 41% of the variability): (1) individuals mostly composed of C1ky, (2)  
468 those mostly composed of C1ag or C1d (separated with the third principal component) and (3)  
469 individuals mostly composed of C40c (Table 1 & Fig. S14 in Appendix 4).

470 Concerning localities, significant differences were found for Chao1 (again, without any  
471 obvious pattern; non-parametric permutational anova;  $F_{(13,238)} = 5.94$ ,  $P < 10^{-3***}$ ), but neither for  
472 Shannon (non-parametric permutational anova;  $F_{(13,238)} = 1.69$ ,  $P = 0.07^{NS}$ ; Fig. S12), nor by  
473 looking the individual proportions (Fig. S13) or the NMDS (Fig. S14).

474

475 ***Summary of all Evidences***

476 Genomic analyses allowed the definition of 21 GSHs, while only four species hypotheses  
477 were distinguished if based only on Symbiodiniaceae communities, and up to 10 based only on  
478 qualitative micromorphology. Thus, combining evidences from all approaches (i.e., genomics,  
479 genetics, macro- and micromorphology, and symbiosis ecology) and considering the existence of  
480 two species only if supported by all criteria, only one single unambiguous species (corresponding to  
481 the entire genus) could be delimited (i.e., no separation appears fully supported; Table 1).  
482 Removing the Symbiodiniaceae criterion, five species, corresponding to Clades 1-3, GSH13b and  
483 GSH09 *sensu lato*, could be delimited. Then, sequentially removing the macro- and  
484 micromorphology criteria (i.e., considering all genetic evidences alone) could lead to nine and 12  
485 species (Table 1). However, three out of the four GSHs within GSH09 *sensu lato* are split by other  
486 criteria (morphology and sometimes Symbiodiniaceae), supporting some genetic and genomic  
487 evidences. Conversely, considering two species once a single criterion separates them, genomics  
488 alone allows to distinguish all partitions. Consequently, we discuss below the usefulness of each  
489 criterion and propose a parsimonious consensus of 13 species strongly supported by most  
490 approaches (Table 1). Among them, three (*P. acuta*, *P. damicornis* and *P. grandis*) could represent  
491 species complexes according genetic evidences, and six were not attributed to a currently valid  
492 species, potentially representing new species (Table 1).

493

494 **DISCUSSION**

495 Although accurately delimiting species remains of particular importance and requires  
496 integrating multiple criteria, all investigated criteria do not provide the same resolution nor  
497 congruent insights. Not all criteria should therefore obviously be considered equally in order to  
498 define a consensus of the species limits as parsimonious as possible. As an illustration, both pigs  
499 and humans have four limbs, udders, etc., but that does not mean they belong to the same species.  
500 Conversely, eye colour does not distinguish different species in humans. Thus, in this study,

## SPECIES DELIMITATION IN *POCILLOPORA* CORALS

501 focusing on the scleractinian genus *Pocillopora* across a wide range of sampled localities (18  
502 islands or regions from three marine provinces), genetic, morphological, geographical and  
503 symbiosis data were collected and compared to define robust species limits and assess the  
504 usefulness of each criterion. The different genetic approaches allowed to delimit 21 genomic  
505 species hypotheses (GSHs) where only seven are currently recognised based on current taxonomy.  
506 Moreover, 13 species appear strongly supported by all approaches, supporting the presence of six  
507 potentially new species that need to be formally described. Some of the other GSHs were supported  
508 by biogeographic or symbiosis evidences, but additional investigations are needed to state on their  
509 species status. In any case, a taxonomical revision of the *Pocillopora* genus, taking into account  
510 evidences brought by these results and previous ones, becomes urgent. This will allow to give  
511 formal names to the new species and thus throw off the multitude of current nomenclatures based  
512 on genetic lineages which can be difficult to follow, even for specialists.

513

### 514 ***On the (Ir)Relevance of Symbiosis Ecology to Define Species***

515 As many scleractinian genera, *Pocillopora* species host diverse communities of symbionts  
516 (Cunning et al. 2017; Brener-Raffalli et al. 2018; Li et al. 2021; Rabbani et al. 2021). In this genus,  
517 Symbiodiniaceae are expected to be maternally transmitted (vertical transmission), as they are  
518 already present in oocytes before spawning (Sier and Olive 1994; Hirose et al. 2001; Harii et al.  
519 2002). Such symbiont inheritance could result in species-specific associations and co-evolutions  
520 (Pinzón and LaJeunesse 2011; Schmidt-Roach et al. 2012; Johnston et al. 2022), that could also be  
521 responsible for habitat specialisations (driven by symbionts thermotolerance and photosynthetic  
522 needs; Jokiel and York 1982; Baker et al. 2013; Brener-Raffalli et al. 2018; Ros et al. 2021).  
523 Characterising associated Symbiodiniaceae communities can therefore bring additional elements to  
524 the delimitation of *Pocillopora* species, as in other scleractinian genera (Bongaerts et al. 2010;  
525 Keshavmurthy et al. 2013; Warner et al. 2015; Arrigoni et al. 2016; Forsman et al. 2020), but this  
526 does not guarantee a self-sufficient criterion.

OURY ET AL.

527           Indeed, symbiosis ecology alone does not appear informative enough to delimit species, as  
528 evidenced by our results. We found a high prevalence of *Cladocopium* C1 (*C. goreau*) and C40,  
529 both host-generalists, consistently with other studies on *Pocillopora* (e.g., Magalon et al. 2007;  
530 Pinzón and LaJeunesse 2011; Schmidt-Roach et al. 2012; Brener-Raffalli et al. 2018; Armstrong et  
531 al. 2021; Johnston et al. 2022). C1 variants allowed to distinguish five groups of colonies with  
532 distinct Symbiodiniaceae communities, but colonies within those groups were very distinct  
533 morphologically and genetically. Conversely, colonies from a single GSH generally shared the  
534 same communities.

535           These results should nevertheless be considered cautiously as (1) host-symbiont associations  
536 may vary over time and depth (Cunning et al. 2013), and (2) quantitative interpretation of  
537 metabarcoding results can be misleading (Lamb et al. 2019). First, Pinzón and LaJeunesse (2011)  
538 found that *Pocillopora* type 1 (ORF27; probably GSH09b or GSH09<sub>C<sub>TSP</sub></sub>) was the only type  
539 associated to the thermotolerant *Durusdinium glynnii* (D1; Wham et al. 2017) in the tropical eastern  
540 Pacific. But it was later found in *Pocillopora* types 3a and 3b (ORF46 and ORF47; GSH13b and  
541 GSH13c, respectively), with different prevalence among sites (Cunning et al. 2013), suggesting  
542 variable host-symbiont associations. In particular, *Durusdinium* would represent an opportunist  
543 genus, replacing specialist symbionts in health-compromised (e.g., bleached) corals (Stat and Gates  
544 2010), potentially explaining these results. In our study, *Durusdinium* was rare (representing  
545 ca. 0.5% of the sequences in a single individual), suggesting no recent bleaching event prior to  
546 sampling, and thus mature host-symbiont associations. However, horizontal (i.e., from the water  
547 column) acquisition of Symbiodiniaceae remains possible, potentially corrupting species-specific  
548 associations. Second, PCR inherent biases (reviewed in Lamb et al. 2019) can result in differential  
549 sequence amplifications, either quantitatively or qualitatively. This can result in artificial  
550 differences in Symbiodiniaceae compositions among individuals and GSHs. Conversely, rare or  
551 specific Symbiodiniaceae taxa that could be diagnostic of a GSH might not be amplified, sequenced  
552 or detected.



## SPECIES DELIMITATION IN *POCILLOPORA* CORALS

553 Species limits evidences from symbiosis ecology inferred with metabarcoding data should  
554 therefore be taken cautiously, and rather used in support of other criteria in an integrative context.  
555 Besides, this criterion has not been systematically explored in previous taxonomic revisions of  
556 scleractinian genera (e.g., Benzoni et al. 2010; Arrigoni et al. 2020, 2021; Wepfer et al. 2020),  
557 demonstrating that it is not the most relevant criterion.

558

### 559 *Should we Trust Morphology?*

560 While most of the delimited GSHs grouped colonies with one major morphotype (which  
561 could be shared between GSHs), they also harboured high morphotype diversities. This  
562 demonstrates, once again (e.g., Pinzón et al. 2013; Marti-Puig et al. 2014; Gélín et al. 2017b), the  
563 obsolescence of *corallum* macromorphology to define *Pocillopora* species limits, as in other  
564 scleractinian genera (e.g., Warner et al. 2015; Shimpi et al. 2019; Bongaerts et al. 2021; Terraneo et  
565 al. 2021). Indeed, *Pocillopora* corals can display great morphological plasticity mostly driven by  
566 light and currents (Todd 2008). As an illustration, in the Gulf of California, five morphospecies  
567 have been reported (Glynn and Ault 2000), all belonging to mtORF type 1a (= ORF27; Pinzón et al.  
568 2013). Switches from one morphospecies to another have also been demonstrated following shifts  
569 in environmental conditions (Paz-García et al. 2015a, 2015b).

570 Contrary to macromorphology, micromorphology brought additional insights to the refining  
571 of *Pocillopora* species limits, as in other scleractinian genera (e.g., Benzoni et al. 2007; Forsman et  
572 al. 2010; Budd and Stolarski 2011; Stefani et al. 2011; Budd et al. 2012; Arrigoni et al. 2020).  
573 Intraspecific variations were smaller, and several differences, either qualitative or quantitative,  
574 allowed to distinguish almost all GSHs. The GSHs within Clade 2 were not separated, but Schmidt-  
575 Roach et al. (2014) raised several differences that we could not recover. It is also possible that the  
576 morphological characters investigated here were not the most relevant to distinguish these GSHs  
577 (e.g., as for the number of limbs to distinguish humans and pigs).

578 Morphology-based criteria are thus questionable and subject to interpretation (particularly for  
579 the presence/absence of subtle characters) which, coupled with morphological plasticity, makes  
580 them unsuitable for identifying *Pocillopora* species. The misidentification of two out of the three  
581 currently available *Pocillopora* genomes perfectly illustrates this point. While the *P. verrucosa*  
582 genome (Buitrago-López et al. 2020) has been assigned to a GSH consistent with this identification  
583 (GSH13a), the two others were not [the *P. acuta* genome (Vidal-Dupiol et al. 2019) was assigned to  
584 GSH13a (currently considered as *P. verrucosa*) too and the *P. damicornis* genome (Cunning et al.  
585 2018) to GSH09<sub>C<sub>TSP</sub></sub> (*P. grandis*)]. Surprisingly, the colony sequenced for the *P. acuta* genome has  
586 been identified molecularly using the mtORF, but the haplotype was not provided (Vidal-Dupiol et  
587 al. 2019), so we could not verify the identification.

588

### 589 *Exploring Species Limits: Lessons from Genomics*

590 *Pocillopora* species limits have been extensively studied using genetic markers over the past  
591 decades (e.g., Schmidt-Roach et al. 2012; Pinzón et al. 2013; Marti-Puig et al. 2014; Gélin et al.  
592 2017b), revealing a great diversity within some morphospecies (e.g., *P. damicornis*; Schmidt-Roach  
593 et al. 2012). Most of these previous studies used mtDNA and microsatellites to explore species  
594 limits. Only Johnston et al. (2017, 2022) inferred genetic relationships among few tens of  
595 *Pocillopora* colonies from the Pacific using genomic data. Consequently, our study represents the  
596 most extensive investigation to date of the taxonomy of the *Pocillopora* genus using genomics.

597 Our genomic analyses based on SNPs collected from the sequence capture of UCEs and exon  
598 loci provided very congruent results among methods and allowed the robust definition of four main  
599 clades comprising 21 GSHs. However, despite thousands of SNPs and loci analysed, we were not  
600 able to fully resolve GSH relationships, and multiple species tree topologies were inferred (Fig. 2 &  
601 S8 in Appendix 2). Recent species divergences and the presence of several closely related sister  
602 species, as well as introgression, could explain unresolved topologies. Indeed, most GSHs appeared  
603 less than 5 Ma, with a substantial number in the Quaternary (i.e., 0-2.6 Ma; Fig. 3). This suggests a

## SPECIES DELIMITATION IN *POCILLOPORA* CORALS

604 recent radiation, probably linked to major geological and climatic events during the Pliocene or the  
605 Pleistocene [e.g., changes in currents (Philander and Fedorov 2003), glacial-interglacial cycles  
606 (Adams et al. 1999; Lambeck et al. 2002) and formation of the Isthmus of Panama (O’Dea et al.  
607 2016)], as already suggested in this genus (Johnston et al. 2017). Recent divergences also suggest  
608 that some sister GSHs might still be in speciation and are in the grey zone (*sensu* De Queiroz 2007)  
609 where distinctive characters are set up and gene flow are still possible. Not all investigated criteria  
610 can therefore distinguish them and the question of their validity as two distinct species arises.  
611 However, since they harbour distinct allelic states for the SNPs used, and since some SNPs are  
612 coding, differential characters between these GSHs are expected. The question is whether these  
613 characters allow to distinguish species (e.g., eye colour in humans is encoded by over 150 genes,  
614 resulting in many SNPs, and yet it is still a single species). Therefore, parsimoniously, these GSHs  
615 should be considered as a single species that potentially represents a species complex (e.g.,  
616 *P. damicornis* with two GSHs or *P. acuta* with six GSHs), waiting for further (e.g., ecological or  
617 reproductive) evidences to separate them.

618         Interestingly, almost all 21 GSHs corresponded to previously defined genetic species  
619 hypotheses or clusters (based on the mtORF marker and microsatellites). Several GSHs had their  
620 own mtORF or PocHistone haplotypes, confirming that both can be used as diagnostic markers for  
621 some (but not all) *Pocillopora* species. Conversely, the over-partitioning previously found in  
622 several SSHs using microsatellites (e.g., G lin et al. 2018a; Oury et al. 2021) was not retrieved.  
623 This could be an effect either of the limited numbers of loci in microsatellite inferences, or of  
624 genus-level phylogenetic inferences masking such genetic patterns. Genetic criteria therefore appear  
625 robust to define species limits but present a risk of overestimating their number. BFD\*, as other  
626 molecular species delimitation methods, has already been suggested to overestimate the number of  
627 species (Grummer et al. 2014; Hundsdoerfer et al. 2019; Derkarabetian et al. 2022). This supports  
628 the need for integrative approaches, where molecular criteria should be the first criteria to robustly  
629 and objectively explore species limits and define genetic species hypotheses that are then confirmed

OURY ET AL.

630 with other criteria (as previously suggested by Pante et al. 2015). In particular, genomics, although  
631 not systematically necessary to molecularly identify species, appears fundamental to set robust  
632 species limits in such taxa whose phylogenetic reconstructions are complex. So for biodiversity  
633 monitoring (e.g., the global coral reef monitoring network), for each region, an exhaustive inventory  
634 of *Pocillopora* species using genomics/genetics is precognised to first identify the species present in  
635 the field.

636

637 ***From Multiple Criteria to Integrative Taxonomy: Towards a Revision of the Pocillopora Genus***

638 Putting together evidences from all approaches (i.e., genetics, morphology, geography and  
639 symbiosis ecology), 13 species appeared strongly supported, where only seven are currently  
640 recognised based on current taxonomy. Six species thus need formal taxonomic descriptions  
641 (Table 1). Clades 1 and 2 support current taxonomy, the first consisting of a single species  
642 (*P. effusa*, corresponding to GSH01), and the second being consistent with Schmidt-Roach et al.  
643 (2014) taxonomic revision [i.e., three species: *P. damicornis* (GSH04 *sensu lato*), *P. brevicornis*  
644 (GSH10) and *P. acuta* (GSH05 *sensu lato*)]. Further investigations are nevertheless needed to state  
645 whether *P. damicornis* and *P. acuta* represent both species complexes. Indeed, *P. damicornis* was  
646 separated into two GSHs and SSHs (04a and 04b) not supported by other criteria, but which could  
647 be ecologically distinct as previously suggested (Oury et al. 2020a). Similarly, *P. acuta* was  
648 partitioned into several GSHs and SSHs/clusters, either sympatric or allopatric, and some associated  
649 to distinct Symbiodiniaceae. Multiple genetic entities were previously delimited in this species  
650 (Gélin et al. 2017a, 2018b; Torres et al. 2020), questioning its monophyly. Clades 3 and 4 are less  
651 congruent with current taxonomy. First, within Clade 3, all five GSHs are strongly supported by all  
652 other criteria, but we were not able to rely them with a currently accepted species (one of them,  
653 probably GSH13c, should correspond to *P. verrucosa*, but the others seem to be new species). Then,  
654 within Clade 4, four species seemed strongly supported. GSH09a, GSH09b and GSH13b each  
655 correspond to distinct species (GSH09b most probably corresponding to *P. meandrina* Dana, 1846,

## SPECIES DELIMITATION IN *POCILLOPORA* CORALS

656 while *P. villosa nomen nudem* was previously suggested for GSH13b; G lin et al. 2017b). Only  
657 GSH09<sub>CWIO</sub> and GSH09<sub>CTSP</sub> could not be distinguished with certainty and are parsimoniously  
658 considered as different *P. grandis* lineages in allopatry for now, waiting further evidences.

659 In the light of these results, a new taxonomical revision of the *Pocillopora* genus, formally  
660 describing and naming these six new species (corresponding to GSH09a, GSH12, GSH13a,  
661 GSH13b, GSH14 and GSH15) becomes urgent. This will allow to throw off the multitude of current  
662 nomenclatures based on genetic lineages (Pinz n et al. 2013; Marti-Puig et al. 2014; Schmidt-  
663 Roach et al. 2014; G lin et al. 2017b) which can be difficult to follow, even for specialists.

664

665 In conclusion, this study is the most extensive exploration to date of the taxonomy of the  
666 *Pocillopora* genus in terms of both genomic and geographic coverage. This genus represents a  
667 scleractinian taxon for which the definition of species limits has been challenging for decades.  
668 Several other criteria including morphology, biogeography or symbiosis ecology were also  
669 investigated to refine species limits and propose consensually and parsimoniously species  
670 hypotheses in the most integrative way possible. Some criteria appeared thus more informative than  
671 others, but all provided helpful insights for refining species limits. Here, we clearly delimited 21  
672 genomic species hypotheses from 356 colonies sampled in three marine provinces (western Indian  
673 Ocean, tropical southwestern Pacific and south-east Polynesia), of which 13 species were strongly  
674 supported by all approaches and six appear to be new species. Importantly, we demonstrate once  
675 again the obsolescence of *corallum* macromorphology to identify most of the species. Conversely,  
676 micromorphological diagnostic characters and mtORF and PocHistone diagnostic haplotypes were  
677 highlighted for several species. Our recommendation is therefore to systematically identify  
678 *Pocillopora* species using these diagnostic criteria, prior to all types of studies involving the  
679 colonies (e.g., biodiversity, ecology, reproduction, adaptation, connectivity, exo- and endo-  
680 symbiosis...) in order to reduce misidentifications. Finally, our results give new insights into the

OURY ET AL.

681 puzzle of defining *Pocillopora* species limits, supporting the existence of several new species. Next  
682 steps are to formally revise the taxonomy of the *Pocillopora* genus.

683

684 **ACKNOWLEDGEMENTS**

685 Coral sampling in New Caledonia was carried out during COBELO  
686 (<http://dx.doi.org/10.17600/13100100>), BIBELOT (<http://dx.doi.org/10.17600/14003700>), and  
687 CHEST (<http://dx.doi.org/10.17600/15004500>) oceanographic campaigns on board of RV Alis  
688 (IRD), and in the northeastern and northwestern of Madagascar during MAD  
689 (<http://dx.doi.org/10.17600/16004700>) oceanographic campaign on board of RV Antea (IRD).  
690 Sampling in Reunion Island was supported by program CONPOCINPA (LabEx CORAIL fund); in  
691 the south of Madagascar in collaboration with the Institut Halieutique des Sciences Marines  
692 (Tulear); and in Rodrigues Island with the collaboration of the Rodrigues Regional Assembly and  
693 the South-East Marine Protected Area supported by project Biodiversity (POCT FEDER fund); in  
694 Europa, Juan de Nova, and Glorioso Islands by program BIORECIE (financial supports from INEE,  
695 INSU, IRD, AAMP, FRB, TAAF, and the foundation Veolia Environnement); in Tromelin Island  
696 by program ORCIE (INEE), and in Mayotte by program SIREME (FED). HM thanks all the  
697 buddies who helped in photographs during diving (J. Butscher, S. Andréfouët, L. Bigot, and  
698 M. Pinault). We acknowledge the Plateforme Gentyane (microsatellite genotyping) of the Institut  
699 National de Recherche pour l'Agriculture, l'alimentation et l'Environnement (INRAE, Clermont-  
700 Ferrand, France), GenoScreen (Sanger sequencing; Lille, France), the Plateforme iGenSeq (library  
701 preparations and NGS sequencing) of the Institut du Cerveau et de la Moelle épinière (ICM, Paris,  
702 France), and G. Toutirais from the Plateau technique de Microscopie Électronique (scanning  
703 electron microscopy) of the Muséum National d'Histoire Naturelle (MNHN, Paris, France) for  
704 technical supports. We would also like to acknowledge S. Schmidt-Roach for his valuable advice on  
705 preparing SEM samples. Bioinformatics analyses were performed on the Genotoul bioinformatics  
706 platform Toulouse Occitanie (Bioinfo Genotoul,

## SPECIES DELIMITATION IN *POCILLOPORA* CORALS

707 <https://doi.org/10.15454/1.5572369328961167E12>). NO was financially supported by a PhD  
708 contract from the Doctoral School “Sciences, Technologies, Santé” of Reunion Island University.

709

### 710 **FUNDING**

711 This work was supported in part through grants from the LabEx CORAIL (AI  
712 PocillopoRAD).

713

### 714 **DATA AVAILABILITY STATEMENTS**

715 All data underlying this article are available online or upon reasonable request to the  
716 corresponding author. Raw sequencing reads (BioProject PRJNA831687; *Pocillopora* sequence  
717 capture: accession numbers SRR19052129-SRR19052500; Symbiodiniaceae ITS2 metabarcoding:  
718 accession numbers SRR19152377-SRR19152635) and new haplotype sequences (GenBank  
719 accession numbers ON155826-ON155833) were deposited on the NCBI. Microsatellite genotypes,  
720 morphometric data, reference sequences and SNP datasets were deposited on Dryad:  
721 <https://doi.org/XXXXXXXXXX>.

722

### 723 **AUTHOR CONTRIBUTION STATEMENTS**

724 NO and HM designed the study. HM collected samples. NO and HM did lab steps. CN  
725 performed the bioinformatics for the ITS2 metabarcoding. NO performed all other bioinformatics  
726 and analysed the results with helpful guidance from SM and DA. NO wrote the original draft and all  
727 authors reviewed and edited the manuscript.

728

### 729 **REFERENCES**

730 Adams J., Maslin M., Thomas E. 1999. Sudden climate transitions during the Quaternary. *Prog.*  
731 *Phys. Geogr.* 23:1–36.

OURY ET AL.

- 732 Anderson E.C., Thompson E.A. 2002. A model-based method for identifying species hybrids using  
733 multilocus genetic data. *Genetics*. 160:1217–1229.
- 734 Armstrong E.J., Lê-Hoang J., Carradec Q., Aury J.-M., Noel B., Poulain J., Belser C., Da Silva C.,  
735 Wincker P., Tara Pacific Consortium. 2021. Transcriptomic plasticity and symbiont  
736 shuffling underpin *Pocillopora* acclimatization across heat-stress regimes in the Pacific  
737 Ocean. *BioRxiv*.
- 738 Arrigoni R., Benzoni F., Terraneo T.I., Caragnano A., Berumen M.L. 2016. Recent origin and semi-  
739 permeable species boundaries in the scleractinian coral genus *Stylophora* from the Red Sea.  
740 *Sci. Rep.* 6:34612.
- 741 Arrigoni R., Berumen M.L., Mariappan K.G., Beck P.S.A., Hulver A.M., Montano S., Pichon M.,  
742 Strona G., Terraneo T.I., Benzoni F. 2020. Towards a rigorous species delimitation  
743 framework for scleractinian corals based on RAD sequencing: the case study of *Leptastrea*  
744 from the Indo-Pacific. *Coral Reefs*. 39:1001–1025.
- 745 Arrigoni R., Huang D., Berumen M.L., Budd A.F., Montano S., Richards Z.T., Terraneo T.I.,  
746 Benzoni F. 2021. Integrative systematics of the scleractinian coral genera *Caulastrea* ,  
747 *Erythraea* and *Oulophyllia*. *Zool. Scr.:zsc*.12481.
- 748 Baird N.A., Etter P.D., Atwood T.S., Currey M.C., Shiver A.L., Lewis Z.A., Selker E.U., Cresko  
749 W.A., Johnson E.A. 2008. Rapid SNP discovery and genetic mapping using sequenced  
750 RAD markers. *PLoS ONE*. 3:e3376.
- 751 Baker A.C., McClanahan T.R., Starger C.J., Boonstra R.K. 2013. Long-term monitoring of algal  
752 symbiont communities in corals reveals stability is taxon dependent and driven by site-  
753 specific thermal regime. *Mar. Ecol. Prog. Ser.* 479:85–97.
- 754 Benzoni F., Bianchi C.N., Morri C. 2003. Coral communities of the northwestern Gulf of Aden  
755 (Yemen): variation in framework building related to environmental factors and biotic  
756 conditions. *Coral Reefs*. 22:475–484.



## SPECIES DELIMITATION IN *POCILLOPORA* CORALS

- 757 Benzoni F., Stefani F., Pichon M., Galli P. 2010. The name game: morpho-molecular species  
758 boundaries in the genus *Psammocora* (Cnidaria, Scleractinia). *Zool. J. Linn. Soc.* 160:421–  
759 456.
- 760 Benzoni F., Stefani F., Stolarski J., Pichon M., Mitta G., Galli P. 2007. Debating phylogenetic  
761 relationships of the scleractinian *Psammocora*: molecular and morphological evidences.  
762 *Contrib. Zool.* 76:35–54.
- 763 Bongaerts P., Cooke I.R., Ying H., Wels D., den Haan S., Hernandez-Agreda A., Brunner C.A.,  
764 Dove S., Englebert N., Eyal G., Forêt S., Grinblat M., Hay K.B., Harii S., Hayward D.C.,  
765 Lin Y., Mihaljević M., Moya A., Muir P., Sinniger F., Smallhorn-West P., Torda G., Ragan  
766 M.A., van Oppen M.J.H., Hoegh-Guldberg O. 2021. Morphological stasis masks  
767 ecologically divergent coral species on tropical reefs. *Curr. Biol.* 31:2286–2298.
- 768 Bongaerts P., Riginos C., Ridgway T., Sampayo E.M., van Oppen M.J.H., Englebert N., Vermeulen  
769 F., Hoegh-Guldberg O. 2010. Genetic divergence across habitats in the widespread coral  
770 *Seriatopora hystrix* and its associated *Symbiodinium*. *PLoS ONE.* 5:10871.
- 771 Bouckaert R., Vaughan T.G., Barido-Sottani J., Duchêne S., Fourment M., Gavryushkina A., Heled  
772 J., Jones G., Kühnert D., Maio N.D., Matschiner M., Mendes F.K., Müller N.F., Ogilvie  
773 H.A., Plessis L. du, Poppinga A., Rambaut A., Rasmussen D., Siveroni I., Suchard M.A., Wu  
774 C.-H., Xie D., Zhang C., Stadler T., Drummond A.J. 2019. BEAST 2.5: an advanced  
775 software platform for Bayesian evolutionary analysis. *PLoS Comput. Biol.* 15:1006650.
- 776 Bouckaert R.R. 2010. DensiTree: making sense of sets of phylogenetic trees. *Bioinformatics.*  
777 26:1372–1373.
- 778 Bray J.R., Curtis J.T. 1957. An ordination of the upland forest communities of southern Wisconsin.  
779 *Ecol. Monogr.* 27:326–349.
- 780 Brener-Raffalli K., Clerissi C., Vidal-Dupiol J., Adjeroud M., Bonhomme F., Pratlong M., Aurelle  
781 D., Mitta G., Toulza E. 2018. Thermal regime and host clade, rather than geography, drive

OURY ET AL.

- 782           *Symbiodinium* and bacterial assemblages in the scleractinian coral *Pocillopora damicornis*  
783           *sensu lato*. *Microbiome*. 6:39.
- 784 Bryant D., Bouckaert R., Felsenstein J., Rosenberg N.A., RoyChoudhury A. 2012. Inferring species  
785           trees directly from biallelic genetic markers: bypassing gene trees in a full coalescent  
786           analysis. *Mol. Biol. Evol.* 29:1917–1932.
- 787 Budd A.F., Fukami H., Smith N.D., Knowlton N. 2012. Taxonomic classification of the reef coral  
788           family Mussidae (Cnidaria: Anthozoa: Scleractinia). *Zool. J. Linn. Soc.* 166:465–529.
- 789 Budd A.F., Stolarski J. 2011. Corallite wall and septal microstructure in scleractinian reef corals:  
790           comparison of molecular clades within the family Faviidae. *J. Morphol.* 272:66–88.
- 791 Buitrago-López C., Mariappan K.G., Cardenas A., Gegner H.M., Voolstra C.R. 2020. The genome  
792           of the cauliflower coral *Pocillopora verrucosa*. *Genome Biol. Evol.* 12:1911–1917.
- 793 Chen C.A., Chang C.-C., Wei N.V., Chen C.-H., Lein Y.-T., Lin H.-E., Dai C.-F., Wallace C.C.  
794           2004. Secondary structure and phylogenetic utility of the ribosomal internal transcribed  
795           spacer 2 (ITS2) in scleractinian corals. *Zool Stud.* 43:759–771.
- 796 Chevalier J.-P. 1971. Les scléactiniaires de la Mélanésie française (Nouvelle-Calédonie, Iles  
797           Chesterfield, Iles Loyauté, Nouvelles-Hébrides): 1ère partie. Fondation Singer-Polignac.
- 798 Combosch D.J., Guzman H.M., Schuhmacher H., Vollmer S.V. 2008. Interspecific hybridization  
799           and restricted trans-Pacific gene flow in the Tropical Eastern Pacific *Pocillopora*. *Mol. Ecol.*  
800           17:1304–1312.
- 801 Combosch D.J., Vollmer S.V. 2015. Trans-Pacific RAD-Seq population genomics confirms  
802           introgressive hybridization in Eastern Pacific *Pocillopora* corals. *Mol. Phylogenet. Evol.*  
803           88:154–162.
- 804 Cunha R.L., Forsman Z.H., Belderok R., Knapp I.S.S., Castilho R., Toonen R.J. 2019. Rare coral  
805           under the genomic microscope: timing and relationships among Hawaiian *Montipora*. *BMC*  
806           *Evol. Biol.* 19:153.

## SPECIES DELIMITATION IN *POCILLOPORA* CORALS

- 807 Cuning R., Bay R.A., Gillette P., Baker A.C., Traylor-Knowles N. 2018. Comparative analysis of  
808 the *Pocillopora damicornis* genome highlights role of immune system in coral evolution.  
809 Sci. Rep. 8:16134.
- 810 Cuning R., Gates R.D., Edmunds P.J. 2017. Using high-throughput sequencing of ITS2 to describe  
811 *Symbiodinium* metacommunities in St. John, US Virgin Islands. PeerJ. 5:3472.
- 812 Cuning R., Glynn P.W., Baker A.C. 2013. Flexible associations between *Pocillopora* corals and  
813 *Symbiodinium* limit utility of symbiosis ecology in defining species. Coral Reefs. 32:795–  
814 801.
- 815 Davey J.W., Hohenlohe P.A., Etter P.D., Boone J.Q., Catchen J.M., Blaxter M.L. 2011. Genome-  
816 wide genetic marker discovery and genotyping using next-generation sequencing. Nat. Rev.  
817 Genet. 12:499–510.
- 818 De Queiroz K. 2005. A unified concept of species and its consequences for the future of taxonomy.  
819 Proc. Calif. Acad. Sci. 56(Suppl 1):196–215.
- 820 De Queiroz K. 2007. Species concepts and species delimitation. Syst. Biol. 56:879–886.
- 821 Derkarabetian S., Starrett J., Hedin M. 2022. Using natural history to guide supervised machine  
822 learning for cryptic species delimitation with genetic data. Front. Zool. 19:8.
- 823 Faircloth B.C., McCormack J.E., Crawford N.G., Harvey M.G., Brumfield R.T., Glenn T.C. 2012.  
824 Ultraconserved elements anchor thousands of genetic markers spanning multiple  
825 evolutionary timescales. Syst. Biol. 61:717–726.
- 826 Faircloth B.C., Sorenson L., Santini F., Alfaro M.E. 2013. A phylogenomic perspective on the  
827 radiation of ray-finned fishes based upon targeted sequencing of ultraconserved elements  
828 (UCEs). PLoS ONE. 8:65923.
- 829 Flot J.-F., Tillier S. 2007. The mitochondrial genome of *Pocillopora* (Cnidaria: Scleractinia)  
830 contains two variable regions: the putative D-loop and a novel ORF of unknown function.  
831 Gene. 401:80–87.

OURY ET AL.

- 832 Forsman Z.H., Barshis D.J., Hunter C.L., Toonen R.J. 2009. Shape-shifting corals: molecular  
833 markers show morphology is evolutionarily plastic in *Porites*. BMC Evol. Biol. 9:45.
- 834 Forsman Z.H., Concepcion G.T., Haverkort R.D., Shaw R.W., Maragos J.E., Toonen R.J. 2010.  
835 Ecomorph or endangered coral? DNA and microstructure reveal Hawaiian species  
836 complexes: *Montipora dilatata/flabellata/turgescens* & *M. patula/verrilli*. PLoS ONE.  
837 5:15021.
- 838 Forsman Z.H., Knapp I.S.S., Tisthammer K., Eaton D.A.R., Belcaid M., Toonen R.J. 2017. Coral  
839 hybridization or phenotypic variation? Genomic data reveal gene flow between *Porites*  
840 *lobata* and *P. compressa*. Mol. Phylogenet. Evol. 111:132–148.
- 841 Forsman Z.H., Ritson-Williams R., Tisthammer K.H., Knapp I.S.S., Toonen R.J. 2020. Host-  
842 symbiont coevolution, cryptic structure, and bleaching susceptibility, in a coral species  
843 complex (Scleractinia; Poritidae). Sci. Rep. 10:16995.
- 844 Frichot E., Mathieu F., Trouillon T., Bouchard G., François O. 2014. Fast and efficient estimation  
845 of individual ancestry coefficients. Genetics. 196:973–983.
- 846 Fukami H., Chen C.A., Budd A.F., Collins A., Wallace C., Chuang Y.-Y., Chen C., Dai C.-F., Iwao  
847 K., Sheppard C., Knowlton N. 2008. Mitochondrial and nuclear genes suggest that stony  
848 corals are monophyletic but most families of stony corals are not (Order Scleractinia, Class  
849 Anthozoa, Phylum Cnidaria). PLoS ONE. 3:3222.
- 850 Gélín P., Fauvelot C., Bigot L., Baly J., Magalon H. 2018a. From population connectivity to the art  
851 of striping Russian dolls: the lessons from *Pocillopora* corals. Ecol. Evol. 8:1411–1426.
- 852 Gélín P., Fauvelot C., Mehn V., Bureau S., Rouzé H., Magalon H. 2017a. Superclone expansion,  
853 long-distance clonal dispersal and local genetic structuring in the coral *Pocillopora*  
854 *damicornis* type  $\beta$  in Reunion Island, South Western Indian Ocean. PLoS ONE.  
855 12:0169692.

## SPECIES DELIMITATION IN *POCILLOPORA* CORALS

- 856 G lin P., Pirog A., Fauvelot C., Magalon H. 2018b. High genetic differentiation and low  
857 connectivity in the coral *Pocillopora damicornis* type  $\beta$  at different spatial scales in the  
858 Southwestern Indian Ocean and the Tropical Southwestern Pacific. *Mar. Biol.*:165–167.
- 859 G lin P., Postaire B., Fauvelot C., Magalon H. 2017b. Reevaluating species number, distribution  
860 and endemism of the coral genus *Pocillopora* Lamarck, 1816 using species delimitation  
861 methods and microsatellites. *Mol. Phylogenet. Evol.* 109:430–446.
- 862 Glynn P.W., Ault J.S. 2000. A biogeographic analysis and review of the far eastern Pacific coral  
863 reef region. *Coral Reefs*. 19:1–23.
- 864 Gnirke A., Melnikov A., Maguire J., Rogov P., LeProust E.M., Brockman W., Fennell T.,  
865 Giannoukos G., Fisher S., Russ C. 2009. Solution hybrid selection with ultra-long  
866 oligonucleotides for massively parallel targeted sequencing. *Nat. Biotechnol.* 27:182–189.
- 867 Grummer J.A., Bryson R.W. Jr., Reeder T.W. 2014. Species delimitation using Bayes factors:  
868 simulations and application to the *Sceloporus scalaris* species group (Squamata:  
869 Phrynosomatidae). *Syst. Biol.* 63:119–133.
- 870 Harii S., Kayanne H., Takigawa H., Hayashibara T., Yamamoto M. 2002. Larval survivorship,  
871 competency periods and settlement of two brooding corals, *Heliopora coerulea* and  
872 *Pocillopora damicornis*. *Mar. Biol.* 141:39–46.
- 873 Harvey M.G., Smith B.T., Glenn T.C., Faircloth B.C., Brumfield R.T. 2016. Sequence capture  
874 versus restriction site associated DNA sequencing for shallow systematics. *Syst. Biol.*  
875 65:910–924.
- 876 Hellberg M.E. 2006. No variation and low synonymous substitution rates in coral mtDNA despite  
877 high nuclear variation. *BMC Evol. Biol.* 6:24.
- 878 Hellberg M.E., Prada C., Tan M.H., Forsman Z.H., Baums I.B. 2016. Getting a grip at the edge:  
879 recolonization and introgression in eastern Pacific *Porites* corals. *J. Biogeogr.* 43:2147–  
880 2159.

OURY ET AL.

- 881 Heron S.F., van Hooidonk R., Maynard J., Anderson K., Day J.C., Geiger E., Hoegh-Guldberg O.,  
882 Hughes T., Marshall P., Obura D. 2018. Impacts of climate change on World Heritage coral  
883 reefs: update to the first global scientific assessment. Paris: UNESCO World Heritage  
884 Centre.
- 885 Hervé M. 2021. RVAideMemoire: testing and plotting procedures for biostatistics. R package  
886 version 0.9-64.
- 887 Hirose M., Kinzie III R.A., Hidaka M. 2001. Timing and process of entry of zooxanthellae into  
888 oocytes of hermatypic corals. *Coral Reefs*. 20:273–280.
- 889 Hodges E., Xuan Z., Baliya V., Kramer M., Molla M.N., Smith S.W., Middle C.M., Rodesch M.J.,  
890 Albert T.J., Hannon G.J., McCombie W.R. 2007. Genome-wide in situ exon capture for  
891 selective resequencing. *Nat. Genet.* 39:1522–1527.
- 892 Hoeksema B.W., Cairns S.D. 2022. World list of Scleractinia. *Pocillopora* Lamarck, 1816.  
893 Available from <http://www.marinespecies.org/aphia.php?p=taxdetails&id=206938>.
- 894 Hughes T.P., Anderson K.D., Connolly S.R., Heron S.F., Kerry J.T., Lough J.M., Baird A.H., Baum  
895 J.K., Berumen M.L., Bridge T.C. 2018. Spatial and temporal patterns of mass bleaching of  
896 corals in the Anthropocene. *Science*. 359:80–83.
- 897 Hughes T.P., Barnes M.L., Bellwood D.R., Cinner J.E., Cumming G.S., Jackson J.B., Kleypas J.,  
898 Van De Leemput I.A., Lough J.M., Morrison T.H. 2017. Coral reefs in the Anthropocene.  
899 *Nature*. 546:82–90.
- 900 Hughes T.P., Kerry J.T., Baird A.H., Connolly S.R., Chase T.J., Dietzel A., Hill T., Hoey A.S.,  
901 Hoogenboom M.O., Jacobson M. 2019. Global warming impairs stock–recruitment  
902 dynamics of corals. *Nature*. 568:387–390.
- 903 Hume B.C.C., Smith E.G., Ziegler M., Warrington H.J.M., Burt J.A., LaJeunesse T.C.,  
904 Wiedenmann J., Voolstra C.R. 2019. SymPortal: a novel analytical framework and platform  
905 for coral algal symbiont next-generation sequencing ITS2 profiling. *Mol. Ecol. Resour.*  
906 19:1063–1080.

## SPECIES DELIMITATION IN *POCILLOPORA* CORALS

- 907 Hundsdoerfer A.K., Lee K.M., Kitching I.J., Mutanen M. 2019. Genome-wide SNP data reveal an  
908 overestimation of species diversity in a group of Hawkmoths. *Genome Biol. Evol.* 11:2136–  
909 2150.
- 910 Huson D.H., Bryant D. 2006. Application of phylogenetic networks in evolutionary studies. *Mol.*  
911 *Biol. Evol.* 23:254–267.
- 912 Johnston E.C., Cunning R., Burgess S.C. 2022. Cophylogeny and specificity between cryptic coral  
913 species (*Pocillopora* spp.) at Mo’orea and their symbionts (Symbiodiniaceae). *BioRxiv*.
- 914 Johnston E.C., Forsman Z.H., Flot J.-F., Schmidt-Roach S., Pinzón J.H., Knapp I.S.S., Toonen R.J.  
915 2017. A genomic glance through the fog of plasticity and diversification in *Pocillopora*. *Sci.*  
916 *Rep.* 7:5991.
- 917 Johnston E.C., Forsman Z.H., Toonen R.J. 2018. A simple molecular technique for distinguishing  
918 species reveals frequent misidentification of Hawaiian corals in the genus *Pocillopora*.  
919 *PeerJ.* 6:4355.
- 920 Jokiel P.L., York Jr. Richard H. 1982. Solar ultraviolet photobiology of the reef coral *Pocillopora*  
921 *damicornis* and symbiotic zooxanthellae. *Bull. Mar. Sci.* 32:301–315.
- 922 Jombart T., Devillard S., Balloux F. 2010. Discriminant analysis of principal components: a new  
923 method for the analysis of genetically structured populations. *BMC Genet.* 11:94.
- 924 Kass R.E., Raftery A.E. 1995. Bayes factors. *J. Am. Stat. Assoc.* 90:773–795.
- 925 Katoh K., Standley D.M. 2013. MAFFT multiple sequence alignment software version 7:  
926 improvements in performance and usability. *Mol. Biol. Evol.* 30:772–780.
- 927 Keshavmurthy S., Yang S.-Y., Alamaru A., Chuang Y.-Y., Pichon M., Obura D., Fontana S., De  
928 Palmas S., Stefani F., Benzoni F., MacDonald A., Noreen A.M.E., Chen C., Wallace C.C.,  
929 Pillay R.M., Denis V., Amri A.Y., Reimer J.D., Mezaki T., Sheppard C., Loya Y., Abelson  
930 A., Mohammed M.S., Baker A.C., Mostafavi P.G., Suharsono B.A., Chen C.A. 2013. DNA  
931 barcoding reveals the coral “laboratory-rat”, *Stylophora pistillata* encompasses multiple  
932 identities. *Sci. Rep.* 3:1520.

OURY ET AL.

- 933 Kivelä M., Arnaud-Haond S., Saramäki J. 2015. EDENetworks: a user-friendly software to build  
934 and analyse networks in biogeography, ecology and population genetics. *Mol. Ecol. Resour.*  
935 15:117–122.
- 936 Kozlov A.M., Darriba D., Flouri T., Morel B., Stamatakis A. 2019. RAxML-NG: a fast, scalable  
937 and user-friendly tool for maximum likelihood phylogenetic inference. *Bioinformatics.*  
938 35:4453–4455.
- 939 LaJeunesse T.C. 2005. “Species” radiations of symbiotic Dinoflagellates in the Atlantic and Indo-  
940 Pacific since the Miocene-Pliocene transition. *Mol. Biol. Evol.* 22:570–581.
- 941 Lamb P.D., Hunter E., Pinnegar J.K., Creer S., Davies R.G., Taylor M.I. 2019. How quantitative is  
942 metabarcoding: a meta-analytical approach. *Mol. Ecol.* 28:420–430.
- 943 Lambeck K., Esat T.M., Potter E.-K. 2002. Links between climate and sea levels for the past three  
944 million years. *Nature.* 419:199–206.
- 945 Lê S., Josse J., Husson F. 2008. FactoMineR: an R package for multivariate analysis. *J. Stat.*  
946 *Softw.* 25.
- 947 Leaché A.D., Fujita M.K., Minin V.N., Bouckaert R.R. 2014. Species delimitation using genome-  
948 wide SNP data. *Syst. Biol.* 63:534–542.
- 949 Li J., Long L., Zou Y., Zhang S. 2021. Microbial community and transcriptional responses to  
950 increased temperatures in coral *Pocillopora damicornis* holobiont. *Environ. Microbiol.*  
951 23:826–843.
- 952 Magalon H., Flot J.-F., Baudry E. 2007. Molecular identification of symbiotic dinoflagellates in  
953 Pacific corals in the genus *Pocillopora*. *Coral Reefs.* 26:551–558.
- 954 Marti-Puig P., Forsman Z.H., Haverkort-Yeh R.D., Knapp I.S., Maragos J.E., Toonen R.J. 2014.  
955 Extreme phenotypic polymorphism in the coral genus *Pocillopora*; micro-morphology  
956 corresponds to mitochondrial groups, while colony morphology does not. *Bull. Mar. Sci.*  
957 90:211–231.



## SPECIES DELIMITATION IN *POCILLOPORA* CORALS

- 958 Mayden R.L. 1997. A hierarchy of species concepts: the denouement in the saga of the species  
959 problem. *Species: the units of diversity*. Chapman & Hall. p. 381–423.
- 960 McCormack J.E., Faircloth B.C., Crawford N.G., Gowaty P.A., Brumfield R.T., Glenn T.C. 2012.  
961 Ultraconserved elements are novel phylogenomic markers that resolve placental mammal  
962 phylogeny when combined with species-tree analysis. *Genome Res.* 22:746–754.
- 963 Metzker M.L. 2010. Sequencing technologies—the next generation. *Nat. Rev. Genet.* 11:31–46.
- 964 Nakajima Y., Nishikawa A., Iguchi A., Nagata T., Uyeno D., Sakai K., Mitarai S. 2017. Elucidating  
965 the multiple genetic lineages and population genetic structure of the brooding coral  
966 *Seriatopora* (Scleractinia: Pocilloporidae) in the Ryukyu Archipelago. *Coral Reefs.* 36:415–  
967 426.
- 968 Narum S.R., Buerkle C.A., Davey J.W., Miller M.R., Hohenlohe P.A. 2013. Genotyping-by-  
969 sequencing in ecological and conservation genomics. *Mol. Ecol.* 22:2841–2847.
- 970 Nei M. 1972. Genetic distance between populations. *Am. Nat.* 106:283–292.
- 971 O’Dea A., Lessios H.A., Coates A.G., Eytan R.I., Restrepo-Moreno S.A., Cione A.L., Collins L.S.,  
972 De Queiroz A., Farris D.W., Norris R.D. 2016. Formation of the Isthmus of Panama. *Sci.*  
973 *Adv.* 2:1600883.
- 974 Oksanen J., Blanchet F.G., Friendly M., Kindt R., Legendre P., McGlinn D., Minchin P.R., O’Hara  
975 R.B., Simpson G.L., Solymos P., Stevens M.H.H., Szoecs E., Wagner H. 2020. vegan:  
976 community ecology package. R package version 2.5-7.
- 977 Oury N., Gélín P., Magalon H. 2020a. Cryptic species and genetic connectivity among populations  
978 of the coral *Pocillopora damicornis* (Scleractinia) in the tropical southwestern Pacific. *Mar.*  
979 *Biol.* 167:142.
- 980 Oury N., Gélín P., Magalon H. 2020b. Together stronger: Intracolony genetic variability  
981 occurrence in *Pocillopora* corals suggests potential benefits. *Ecol. Evol.* 10:5208–5218.
- 982 Oury N., Gélín P., Magalon H. 2021. High connectivity within restricted distribution range in  
983 *Pocillopora* corals. *J. Biogeogr.* 48:1679–1692.

OURY ET AL.

- 984 Oury N., G elin P., Rajaonarivelo M., Magalon H. 2022. Exploring the *Pocillopora* cryptic diversity:  
985 a new genetic lineage in the Western Indian Ocean or remnants from an ancient one? Mar.  
986 Biodivers. 52:5.
- 987 Pante E., Puillandre N., Viricel A., Arnaud-Haond S., Aurelle D., Castelin M., Chenuil A.,  
988 Destombe C., Forcioli D., Valero M., Viard F., Samadi S. 2015. Species are hypotheses:  
989 avoid connectivity assessments based on pillars of sand. Mol. Ecol. 24:525–544.
- 990 Paz-Garc a D.A., Aldana-Moreno A., Cabral-Tena R.A., Garc a-De-Le on F.J., Hellberg M.E.,  
991 Balart E.F. 2015a. Morphological variation and different branch modularity across  
992 contrasting flow conditions in dominant *Pocillopora* reef-building corals. Oecologia.  
993 178:207–218.
- 994 Paz-Garc a D.A., Hellberg M.E., Garc a-de-Le on F.J., Balart E.F. 2015b. Switch between  
995 morphospecies of *Pocillopora* corals. Am. Nat. 186:434–440.
- 996 Pembleton L.W., Cogan N.O.I., Forster J.W. 2013. StAMPP: an R package for calculation of  
997 genetic differentiation and structure of mixed-ploidy level populations. Mol. Ecol. Resour.  
998 13:946–952.
- 999 Philander S.G., Fedorov A.V. 2003. Role of tropics in changing the response to Milankovich  
1000 forcing some three million years ago. Paleoclimatology. 18:1045.
- 1001 Pinz n J.H., LaJeunesse T.C. 2011. Species delimitation of common reef corals in the genus  
1002 *Pocillopora* using nucleotide sequence phylogenies, population genetics and symbiosis  
1003 ecology. Mol. Ecol. 20:311–325.
- 1004 Pinz n J.H., Sampayo E., Cox E., Chauka L.J., Chen C.A., Voolstra C.R., LaJeunesse T.C. 2013.  
1005 Blind to morphology: genetics identifies several widespread ecologically common species  
1006 and few endemics among Indo-Pacific cauliflower corals (*Pocillopora*, Scleractinia). J.  
1007 Biogeogr. 40:1595–1608.
- 1008 Price M.N., Dehal P.S., Arkin A.P. 2009. FastTree: computing large minimum evolution trees with  
1009 profiles instead of a distance matrix. Mol. Biol. Evol. 26:1641–1650.

## SPECIES DELIMITATION IN *POCILLOPORA* CORALS

- 1010 Pritchard J.K., Stephens M., Donnelly P. 2000. Inference of population structure using multilocus  
1011 genotype data. *Genetics*. 155:945–959.
- 1012 Quattrini A.M., Faircloth B.C., Dueñas L.F., Bridge T.C.L., Brugler M.R., Calixto-Botía I.F.,  
1013 DeLeo D.M., Forêt S., Herrera S., Lee S.M.Y., Miller D.J., Prada C., Rádis-Baptista G.,  
1014 Ramírez-Portilla C., Sánchez J.A., Rodríguez E., McFadden C.S. 2018. Universal target-  
1015 enrichment baits for anthozoan (Cnidaria) phylogenomics: new approaches to long-standing  
1016 problems. *Mol. Ecol. Resour.* 18:281–295.
- 1017 R Core Team. 2021. R: a language and environment for statistical computing. R Foundation for  
1018 Statistical Computing, Vienna, Austria. URL: <https://www.R-project.org/>.
- 1019 Rabbani G., Huang D., Wainwright B.J. 2021. The mycobiome of *Pocillopora acuta* in Singapore.  
1020 *Coral Reefs*. 40:1419–1427.
- 1021 Richards Z.T., van Oppen M.J.H., Wallace C.C., Willis B.L., Miller D.J. 2008. Some rare Indo-  
1022 Pacific coral species are probable hybrids. *PLoS ONE*. 3:3240.
- 1023 Ros M., Suggett D.J., Edmondson J., Haydon T., Hughes D.J., Kim M., Guagliardo P., Bougoure J.,  
1024 Pernice M., Raina J.-B., Camp E.F. 2021. Symbiont shuffling across environmental  
1025 gradients aligns with changes in carbon uptake and translocation in the reef-building coral  
1026 *Pocillopora acuta*. *Coral Reefs*. 40:595–607.
- 1027 Rueden C.T., Schindelin J., Hiner M.C., DeZonia B.E., Walter A.E., Arena E.T., Eliceiri K.W.  
1028 2017. ImageJ2: ImageJ for the next generation of scientific image data. *BMC*  
1029 *Bioinformatics*. 18:529.
- 1030 Schmidt-Roach S., Lundgren P., Miller K.J., Gerlach G., Noreen A.M.E., Andreakis N. 2012.  
1031 Assessing hidden species diversity in the coral *Pocillopora damicornis* from Eastern  
1032 Australia. *Coral Reefs*. 32:161–172.
- 1033 Schmidt-Roach S., Miller K.J., Lundgren P., Andreakis N. 2014. With eyes wide open: a revision of  
1034 species within and closely related to the *Pocillopora damicornis* species complex  
1035 (Scleractinia; Pocilloporidae) using morphology and genetics. *Zool. J. Linn. Soc.* 170:1–33.

OURY ET AL.

- 1036 Shearer T.L., Van Oppen M.J.H., Romano S.L., Wörheide G. 2002. Slow mitochondrial DNA  
1037 sequence evolution in the Anthozoa (Cnidaria). *Mol. Ecol.* 11:2475–2487.
- 1038 Shimpi G.G., Patel N.P., Haldar S. 2019. Molecular species delimitation of reef-building coral  
1039 genera, *Porites* and *Turbinaria* (Anthozoa: Scleractinia), from the intertidal fringing reefs of  
1040 Gulf of Kutch, India reveals unrecognized diversity. *Syst. Biodivers.* 17:541–557.
- 1041 Sier C.J.S., Olive P.J.W. 1994. Reproduction and reproductive variability in the coral *Pocillopora*  
1042 *verrucosa* from the Republic of Maldives. *Mar. Biol.* 118:713–722.
- 1043 Simpson C., Kiessling W., Mewis H., Baron Szabo R.C., Müller J. 2011. Evolutionary  
1044 diversification of reef corals: a comparison of the molecular and fossil records. *Evolution.*  
1045 65:3274–3284.
- 1046 Stat M., Gates R.D. 2010. Clade D *Symbiodinium* in scleractinian corals: a “nugget” of hope, a  
1047 selfish opportunist, an ominous sign, or all of the above? *J. Mar. Biol.* 2011:730715.
- 1048 Stefani F., Benzoni F., Yang S.-Y., Pichon M., Galli P., Chen C.A. 2011. Comparison of  
1049 morphological and genetic analyses reveals cryptic divergence and morphological plasticity  
1050 in *Stylophora* (Cnidaria, Scleractinia). *Coral Reefs.* 30:1033–1049.
- 1051 Stoltz M., Baeumer B., Bouckaert R., Fox C., Hiscott G., Bryant D. 2021. Bayesian inference of  
1052 species trees using diffusion models. *Syst. Biol.* 70:145–161.
- 1053 Terraneo T.I., Benzoni F., Arrigoni R., Baird A.H., Mariappan K.G., Forsman Z.H., Wooster M.K.,  
1054 Bouwmeester J., Marshall A., Berumen M.L. 2021. Phylogenomics of *Porites* from the  
1055 Arabian Peninsula. *Mol. Phylogenet. Evol.* 161:107173.
- 1056 Terraneo T.I., Benzoni F., Arrigoni R., Berumen M.L. 2016. Species delimitation in the coral genus  
1057 *Goniopora* (Scleractinia, Poritidae) from the Saudi Arabian Red Sea. *Mol. Phylogenet.*  
1058 *Evol.* 102:278–294.
- 1059 Todd P.A. 2008. Morphological plasticity in scleractinian corals. *Biol. Rev.* 83:315–337.

## SPECIES DELIMITATION IN *POCILLOPORA* CORALS

- 1060 Toonen R.J., Puritz J.B., Forsman Z.H., Whitney J.L., Fernandez-Silva I., Andrews K.R., Bird C.E.  
1061 2013. ezRAD: a simplified method for genomic genotyping in non-model organisms. *PeerJ*.  
1062 1:203.
- 1063 Torda G., Schmidt-Roach S., Peplow L.M., Lundgren P., van Oppen M.J.H. 2013. A rapid genetic  
1064 assay for the identification of the most common *Pocillopora damicornis* genetic lineages on  
1065 the great barrier reef. *PLoS ONE*. 8:e58447.
- 1066 Torres A.F., Forsman Z.H., Ravago-Gotanco R. 2020. Shifts in coral clonality along a gradient of  
1067 disturbance: insights on reproduction and dispersal of *Pocillopora acuta*. *Mar. Biol.*  
1068 167:161.
- 1069 van Oppen M.J.H., McDonald B.J., Willis B., Miller D.J. 2001. The evolutionary history of the  
1070 coral genus *Acropora* (Scleractinia, Cnidaria) based on a mitochondrial and a nuclear  
1071 marker: reticulation, incomplete lineage sorting, or morphological convergence? *Mol. Biol.*  
1072 *Evol.* 18:1315–1329.
- 1073 van Oppen M.J.H., Willis B.L., Miller D.J. 1999. Atypically low rate of cytochrome b evolution in  
1074 the scleractinian coral genus *Acropora*. *Proc. R. Soc. B Biol. Sci.* 266:179–183.
- 1075 van Oppen M.J.H., Willis B.L., Vugt H.V., Miller D.J. 2000. Examination of species boundaries in  
1076 the *Acropora cervicornis* group (Scleractinia, Cnidaria) using nuclear DNA sequence  
1077 analyses. *Mol. Ecol.* 9:1363–1373.
- 1078 Vaughan T.W., Wells J.W. 1943. Revision of the suborders, families, and genera of the  
1079 Scleractinia. Boulder: Geological Society of America.
- 1080 Veron J.E.N. 2000. Corals of the world. Australia: Australian Institute of Marine Science.
- 1081 Vidal-Dupiol J., Chaparro C., Pratlong M., Pontarotti P., Grunau C., Mitter G. 2019. Sequencing, *de*  
1082 *novo* assembly and annotation of the genome of the scleractinian coral, *Pocillopora acuta*.  
1083 *BioRxiv*.
- 1084 Vollmer S.V., Palumbi S.R. 2004. Testing the utility of internally transcribed spacer sequences in  
1085 coral phylogenetics. *Mol. Ecol.* 13:2763–2772.

OURY ET AL.

- 1086 Warner P.A., van Oppen M.J.H., Willis B.L. 2015. Unexpected cryptic species diversity in the  
1087 widespread coral *Seriatopora hystrix* masks spatial-genetic patterns of connectivity. *Mol.*  
1088 *Ecol.* 24:2993–3008.
- 1089 Warnes G.R., Bolker B., Bonebakker L., Gentleman R., Huber W., Liaw A., Lumley T., Maechler  
1090 M., Magnusson A., Moeller S., Schwartz M., Venables B. 2020. *gplots*: various R  
1091 programming tools for plotting data. R package version 3.1.1.
- 1092 Weir B.S., Cockerham C.C. 1984. Estimating F-statistics for the analysis of population structure.  
1093 *Evolution.* 38:1358–1370.
- 1094 Wells J.W. 1956. Scleractinia. *Treatise on Invertebrate Paleontology, Part F.* Boulder: Geological  
1095 Society of America. p. F328–F444.
- 1096 Wepfer P.H., Nakajima Y., Sutthacheep M., Radice V.Z., Richards Z., Ang P., Terraneo T., Sudek  
1097 M., Fujimura A., Toonen R.J., Mikheyev A.S., Economo E.P., Mitarai S. 2020.  
1098 Evolutionary biogeography of the reef-building coral genus *Galaxea* across the Indo-Pacific  
1099 ocean. *Mol. Phylogenet. Evol.* 151:106905.
- 1100 Wham D.C., Ning G., LaJeunesse T.C. 2017. *Symbiodinium glynnii* sp. nov., a species of stress-  
1101 tolerant symbiotic dinoflagellates from pocilloporid and montiporid corals in the Pacific  
1102 Ocean. *Phycologia.* 56:396–409.
- 1103 Willis B.L., van Oppen M.J.H., Miller D.J., Vollmer S.V., Ayre D.J. 2006. The role of  
1104 hybridization in the evolution of reef corals. *Annu. Rev. Ecol. Evol. Syst.* 37:489–517.
- 1105
- 1106 **APPENDICES**
- 1107 **Appendix 1** Sampling.
- 1108 **Appendix 2** Molecular Analyses.
- 1109 **Appendix 3** Morphological Analyses.
- 1110 **Appendix 4** Symbiodiniaceae Analyses.
- 1111 **Appendix 5** Illustration of the *Pocillopora* Genomic Species Hypotheses.
